# Supplementary material
Source: PubMed Central journal article supplement (PMC2789517)
Supplement: 212817.f1.pdf [file 212817.f1.pdf]

**SHEET 1****Non-redundant list of proteins  
found in Biyamina secretome**

| <b>Accession number</b> | <b>Protein names</b>                               | <b>Functional categories</b>  | <b>Number of matched peptides</b> | <b>Highest score</b> |
|-------------------------|----------------------------------------------------|-------------------------------|-----------------------------------|----------------------|
| TB927.8.1440            | maoC-like dehydratase                              | 11.8 lipid metabolism         | 4                                 | 85                   |
| TB927.2.4930            | esterase                                           | 11.9.2 lipid metabolism       | 1                                 | 46                   |
| TB927.8.6170            | transketolase                                      | 11.1.31 lipid metabolism      | 13                                | 113                  |
| TB09.211.3540           | glycerol kinase glycosomal                         | 11.5 lipid metabolism         | 5                                 | 91                   |
| TB09.211.3550           | glycerol kinase glycosomal                         | 11.5 lipid metabolism         | 11                                | 119                  |
| TB927.8.6390            | lysophospholipase                                  | 11.9.3 lipid metabolism       | 5                                 | 66                   |
| TB11.01.1820            | biotin--acetyl-CoA-carboxylase ligase              | 11.1.1 lipid metabolism       | 5                                 | 88                   |
| TB11.01.8200            | enoyl-CoA hydratase                                | 11.9.4.3 lipid metabolism     | 1                                 | 102                  |
| TB927.8.3530            | glycerol-3-phosphate dehydrogenase [NAD+],         | 11.5.2 lipid metabolism       | 8                                 | 81                   |
| TB927.3.3900            | carnitine O-palmitoyltransferase II                | 11 lipid metabolism           | 12                                | 80                   |
| TB927.6.2740            | pyridoxal kinase                                   | 18.20* vitamine metabolism    | 10                                | 92                   |
| TB927.4.4070            | mevalonate kinase                                  | 16.1.2.4 secondary metabolism | 1                                 | 45                   |
| TB10.05.0010            | diphosphomevalonate decarboxylase                  | lipid metabolism              | 3                                 | 90                   |
| TB10.61.0980            | glycosomal malate dehydrogenase                    | 6.3 gluconeogenesis           | 7                                 | 91                   |
| TB927.2.4210            | glycosomal phosphoenolpyruvate carboxykinase       | 6.4 gluconeogenese            | 26                                | 122                  |
| TB11.01.3040            | cytosolic malate dehydrogenase                     | 6.3 gluconeogenesis           | 10                                | 116                  |
| TB11.02.3130            | malic enzyme                                       | 6.3 gluconeogenesis.          | 8                                 | 100                  |
| TB927.7.7500            | iron/ascorbate oxidoreductase                      | 6.4 gluconeogenese            | 3                                 | 43                   |
| TB10.70.5110            | mitochondrial malate dehydrogenase                 | 6.3 gluconeogenesis.          | 3                                 | 98                   |
| TB11.02.3120            | malic enzyme                                       | 6.3 gluconeogenesis.          | 5                                 | 62                   |
| TB927.6.1570            | 2-hydroxy-3-oxopropionate reductase                | 6 gluconeogenese              | 7                                 | 94                   |
| TB927.8.7510            | p-nitrophenylphosphatase                           | clohexane degradation         | 1                                 | 47                   |
| TB927.1.710             | phosphoglycerate kinase                            | 4 glycolysis                  | 2                                 | 83                   |
| TB927.1.3830            | glucose-6-phosphate isomerase, glycosomal          | 4 glycolysis                  | 1                                 | 105                  |
| TB10.6K15.3850          | glyceraldehyde 3-phosphate dehydrogenase cytosolic | 4 glycolysis                  | 12                                | 95                   |
| TB927.1.700             | phosphoglycerate kinase                            | 4 glycolysis                  | 3                                 | 48                   |
| TB10.70.1370            | fructose-bisphosphate aldolase glycosomal          | 4 glycolysis                  | 10                                | 93                   |

|                |                                                |                                       |    |     |
|----------------|------------------------------------------------|---------------------------------------|----|-----|
| TB11.02.4150   | pyruvate phosphate dikinase                    | 4 glycolysis                          | 3  | 69  |
| TB927.6.4280   | glyceraldehyde 3-phosphate dehydrogenase       | 4 glycolysis                          | 8  | 81  |
| TB10.70.5800   | hexokinase                                     | 4 glycolysis                          | 1  | 84  |
| TB09.211.1370  | glyceraldehyde-3-phosphate dehydrogenase       | 4 glycolysis                          | 4  | 72  |
| TB10.70.5820   | hexokinase                                     | 4 glycolysis                          | 15 | 104 |
| TB927.3.1790   | pyruvate dehydrogenase E1 beta subunit         | 4 glycolysis                          | 2  | 71  |
| TB10.70.4740   | enolase                                        | 4.12 glycolysis                       | 23 | 136 |
| TB11.02.3210   | triosephosphate isomerase                      | 4.8 glycolysis                        | 11 | 119 |
| TB927.5.3580   | phosphoglycerate mutase protein                | 4.4.11 glycolysis                     | 3  | 75  |
| TB10.6K15.2620 | phosphoglycerate mutase                        | 4.4.11 glycolysis                     | 13 | 102 |
| TB11.01.6410   | phosphomannose isomerase                       | 3 CHO metabolism                      | 5  | 59  |
| TB927.8.980    | phosphoacetylglucosamine mutase                | 3 CHO metabolism                      | 4  | 104 |
| TB11.03.0090   | ribokinase                                     | 3.5 CHO metabolism                    | 1  | 79  |
| TB10.6K15.3600 | myo-inositol-1-phosphate synthase              | 3.4.3 CHO metabolism                  | 4  | 68  |
| TB10.05.0080   | glucosidase                                    | 2.2.2.1CHO metabolism                 | 3  | 53  |
| TB11.01.8520   | glucosamine-6-phosphate isomerase              | 7.1.2 OPP.oxidative PP                | 4  | 77  |
| TB09.211.3180  | 6-phosphogluconate dehydrogenase               | 7.1.3 OPP.oxidative PP                | 1  | 80  |
| TB927.8.5600   | transaldolase                                  | 7.2.2 OPP.non-reductive PP            | 11 | 105 |
| TB11.01.0700   | ribose 5-phosphate isomerase                   | 7.2.4 OPP.non-reductive PP            | 2  | 71  |
| TB11.01.3550   | 2-oxoglutarate dehydrogenase E2 component      | 8.1.5 TCA / org. Transformation       | 8  | 68  |
| TB927.3.2230   | succinyl-CoA synthetase alpha subunit          | 8.1.6 TCA / org. Transformation       | 7  | 70  |
| TB10.61.2880   | ACO aconitase                                  | 8.1.3 TCA / org. Transformation       | 14 | 104 |
| TB11.02.2700   | fumarate hydratase class I                     | 8.1.8 TCA / org. Transformation       | 6  | 136 |
| TB10.6K15.3250 | succinyl-CoA ligase                            | 8.1.6 TCA / org. Transformation       | 1  | 45  |
| TB927.3.4500   | fumarate hydratase                             | 8.1.8 TCA / org. Transformation       | 25 | 107 |
| TB927.8.3690   | isocitrate dehydrogenase                       | 8.1.4 TCA / org. Transformation       | 3  | 54  |
| TB11.01.8470   | dihydrolipoyl dehydrogenase                    | 8.1.1.3 TCA / org. Transformation     | 13 | 140 |
| TB11.02.0290   | succinyl-coA:3-ketoacid-coenzyme A transferase | 8.1.6 TCA / org. Transformation       | 11 | 96  |
| TB11.01.1740   | 2-oxoglutarate dehydrogenase E1 component      | 8.1.5 TCA / org. Transformation       | 1  | 23  |
| TB11.01.0290   | carbonic anhydrase-like protein                | 8.3 TCA / org. Transformation         | 1  | 22  |
| TB11.03.0230   | isocitrate dehydrogenase                       | 8.1.4 TCA / org. Transformation       | 1  | 34  |
| TB927.5.930    | NADH-dependent fumarate reductase              | 8.1.7 TCA / org. Transformation       | 4  | 78  |
| TB10.389.1530  | ribulose-5-phosphate 3-epimerase               | 1.3.11 PS.calvin cyle.RPE             | 1  | 64  |
| TB10.70.0370   | phosphomannomutase                             | 10.1.21 cell wall.precursor synthesis | 4  | 62  |
| TB09.211.1380  | glycine cleavage system H protein              | 13.2.5.2 amino acid metabolism        | 2  | 52  |

|               |                                               |                                        |    |     |
|---------------|-----------------------------------------------|----------------------------------------|----|-----|
| TB927.1.3950  | alanine aminotransferase                      | 13.1.1.3 amino acid metabolism         | 4  | 94  |
| TB09.160.4570 | arginine kinase                               | 13.1.1 amino acid metabolism           | 14 | 84  |
| TB09.160.4560 | arginine kinase                               | 13.1.1 amino acid metabolism           | 5  | 84  |
| TB927.2.4610  | branched-chain amino acid aminotransferase    | 13.1.1.2 amino acid metabolism         | 10 | 81  |
| TB11.01.1350  | S-adenosylhomocysteine hydrolase              | 13.2.3.4 amino acid metabolism         | 18 | 91  |
| TB927.6.1080  | hydroxyacylglutathione hydrolase              | 13.2.3.2 amino acid metabolism         | 9  | 69  |
| TB927.7.1110  | asparagine synthetase a                       | 13.1.1 amino acid metabolism           | 8  | 79  |
| TB927.6.2790  | L-threonine 3-dehydrogenase                   | 13.2 amino acid metabolism             | 17 | 102 |
| TB11.02.5400  | cystathionine beta-synthase                   | 13.1.2.3.11 amino acid metabolism      | 15 | 77  |
| TB10.70.4280  | delta-1-pyrroline-5-carboxylate dehydrogenase | 13.2.2.2 amino acid metabolism         | 16 | 77  |
| TB09.160.4590 | arginine kinase                               | 13.1.1 amino acid metabolism           | 18 | 97  |
| TB09.211.3330 | cystathione gamma lyase                       | 13.1.2.3.11 amino acid metabolism      | 9  | 102 |
| TB927.7.2440  | pyrroline-5-carboxylate reductase             | 13.2.2.2 amino acid metabolism         | 3  | 60  |
| TB927.8.2540  | 3-ketoacyl-CoA thiolase                       | 13.2 amino acid metabolism             | 7  | 91  |
| TB11.02.2740  | aspartate aminotransferase mitochondrial      | 13.1.1.2 amino acid metabolism         | 6  | 77  |
| TB927.8.6060  | 2-amino-3-ketobutyrate coenzyme A ligase      | 13.1.1.2 amino acid metabolism         | 15 | 97  |
| TB10.70.3710  | aspartate aminotransferase                    | 13.1.1.2 amino acid metabolism         | 4  | 79  |
| TB927.5.3820  | aspartate carbamoyltransferase                | 13.1.1.2 amino acid metabolism         | 12 | 92  |
| TB10.70.1320  | N-acetyltransferase subunit Nat1              | 13.1.3.4.3 amino acid metabolism       | 1  | 59  |
| TB927.2.4590  | branched-chain amino acid aminotransferase    | 13.1.1.2 amino acid metabolism         | 3  | 70  |
| TB927.6.4840  | S-adenosylmethionine synthetase               | 13.1.3.4 amino acid metabolism         | 10 | 93  |
| TB10.389.1810 | kynurenine aminotransferase                   | 13.1.1.2 amino acid metabolism         | 6  | 79  |
| TB09.160.0770 | nitrilase                                     | 22.1.5 polyamine metabolism            | 9  | 84  |
| TB09.V1.0380  | spermidine synthase                           | 22.1.7 polyamine metabolism            | 10 | 87  |
| TB927.7.4970  | glutamine synthetase                          | 12.2.2 N-metabolism.ammonia metabolism | 5  | 109 |
| TB09.160.4310 | glutamate dehydrogenase                       | 12.3.1 N-metabolism                    | 1  | 48  |
| TB927.6.950   | cysteinyl-tRNA synthetase                     | 29.1 protein.aa activation             | 3  | 38  |
| TB927.3.5580  | tryptophanyl-tRNA synthetase                  | 29.1 protein.aa activation             | 4  | 69  |
| TB927.7.3620  | tyrosyl-tRNA synthetase                       | 29.1 protein.aa activation             | 4  | 50  |
| TB11.46.0008  | arginyl-tRNA synthetase                       | 29.1 protein.aa activation             | 18 | 71  |
| TB927.5.1090  | threonyl-tRNA synthetase                      | 29.1 protein.aa activation             | 10 | 84  |
| TB11.02.5020  | seryl-tRNA synthetase                         | 29.1 protein.aa activation             | 9  | 109 |
| TB927.4.2310  | asparaginyl-tRNA synthetase                   | 29.1 protein.aa activation             | 3  | 75  |
| TB927.7.2400  | tyrosyl-tRNA synthetase                       | 29.1 protein.aa activation             | 3  | 58  |
| TB927.8.5330  | tyrosyl/methionyl-tRNA synthetase             | 29.1 protein.aa activation             | 2  | 63  |

|                |                                                  |                                     |    |     |
|----------------|--------------------------------------------------|-------------------------------------|----|-----|
| TB927.6.1880   | aspartyl-tRNA synthetase                         | 29.1 protein.aa activation          | 3  | 82  |
| TB11.02.1210   | leucyl-tRNA synthetase                           | 29.1 protein.aa activation          | 18 | 138 |
| TB927.6.4590   | glutamyl-tRNA synthetase                         | 29.1 protein.aa activation          | 2  | 92  |
| TB09.160.3730  | glutaminyl-tRNA synthetase                       | 29.1 protein.aa activation          | 2  | 54  |
| TB927.6.4480   | valyl-tRNA synthetase                            | 29.1 protein.aa activation          | 1  | 24  |
| TB10.70.6470   | methionyl-tRNA synthetase                        | 29.1 protein.aa activation          | 5  | 57  |
| TB927.8.550    | peptide methionine sulfoxide reductase           | 29.11* sulfoxide reductases         | 2  | 31  |
| TB927.3.3610   | peroxisomal targeting signal type 2 receptor     | 29.3 protein.targeting              | 3  | 59  |
| TB10.70.1190   | valosin-containing protein homolog               | 29.3 protein.targeting              | 3  | 67  |
| TB11.02.4170   | 40S ribosomal protein S5                         | 29.2.4 protein.synthesis.elongation | 1  | 66  |
| TB11.03.0410   | eukaryotic translation initiation factor 5a      | 29.2 protein.synthesis              | 4  | 90  |
| TB10.61.1960   | 40S ribosomal protein S2                         | 29.2.4 protein.synthesis.elongation | 1  | 47  |
| TB10.70.1730   | 40S ribosomal protein S18                        | 29.2.4 protein.synthesis.elongation | 1  | 59  |
| TB09.211.0110  | 60S ribosomal protein L10                        | 29.2.4 protein.synthesis.elongation | 1  | 87  |
| TB10.26.0560   | 60S ribosomal protein L6                         | 29.2.4 protein.synthesis.elongation | 2  | 107 |
| TB10.70.4880   | eukaryotic translation initiation factor 5       | 29.2 protein.synthesis              | 1  | 49  |
| TB11.02.3595   | protein translation factor SUI1-like protein     | 29.2 protein.synthesis              | 1  | 49  |
| TB11.01.4830   | eukaryotic translation initiation factor 2 gamma | 29.2 protein.synthesis              | 1  | 53  |
| TB10.70.1770   | eukaryotic translation initiation factor 6       | 29.2 protein.synthesis              | 2  | 79  |
| TB10.70.2650   | elongation factor 2                              | 29.2.4 protein.synthesis.elongation | 23 | 95  |
| TB11.01.2560   | 40S ribosomal protein SA                         | 29.2.4 protein.synthesis.elongation | 3  | 76  |
| TB09.160.3270  | eukaryotic initiation factor 4a                  | 29.2 protein.synthesis              | 12 | 105 |
| TB09.211.4550  | 60S ribosomal protein L12                        | 29.2.4 protein.synthesis.elongation | 2  | 62  |
| TB927.4.3570   | translation elongation factor 1-beta             | 29.2.4 protein.synthesis.elongation | 8  | 73  |
| TB10.70.5680   | elongation factor 1-alpha                        | 29.2.4 protein.synthesis.elongation | 3  | 83  |
| TB10.6K15.0410 | 60S ribosomal protein L18                        | 29.2.4 protein.synthesis.elongation | 1  | 33  |
| TB09.244.2730  | 60S ribosomal protein L5                         | 29.2.4 protein.synthesis.elongation | 7  | 67  |
| TB11.01.4660   | elongation factor 1 gamma                        | 29.2.4 protein.synthesis.elongation | 6  | 82  |
| TB10.70.1100   | translation elongation factor 1-beta             | 29.2.4 protein.synthesis.elongation | 5  | 85  |
| TB10.05.0220   | 60S ribosomal protein L10a                       | 29.2.4 protein.synthesis.elongation | 2  | 59  |
| TB927.4.3590   | translation elongation factor 1-beta             | 29.2.4 protein.synthesis.elongation | 8  | 68  |
| TB927.4.3550   | 60S ribosomal protein L13a                       | 29.2.4 protein.synthesis.elongation | 3  | 55  |
| TB10.70.5650   | TEF1 elongation factor 1-alpha                   | 29.2.4 protein.synthesis.elongation | 8  | 140 |
| TB10.70.3510   | 60S ribosomal protein L18a                       | 29.2.4 protein.synthesis.elongation | 2  | 76  |
| TB927.3.5050   | 60S ribosomal protein L4                         | 29.2.4 protein.synthesis.elongation | 4  | 66  |

|                |                                                |                                            |   |     |
|----------------|------------------------------------------------|--------------------------------------------|---|-----|
| TB11.01.3020   | 40S ribosomal protein L14                      | 29.2.4 protein.synthesis.elongation        | 2 | 46  |
| TB10.70.7695   | 40S ribosomal protein S11                      | 29.2.4 protein.synthesis.elongation        | 2 | 65  |
| TB927.3.3310   | 60S ribosomal protein L13                      | 29.2.4 protein.synthesis.elongation        | 1 | 35  |
| TB10.70.1380   | 40S ribosomal protein S9                       | 29.2.4 protein.synthesis.elongation        | 3 | 38  |
| TB927.5.2570   | translation initiation factor                  | 29.2 protein.synthesis                     | 1 | 73  |
| TB927.8.5880   | eukaryotic translation initiation factor 1A    | 29.2 protein.synthesis                     | 1 | 59  |
| TB09.160.4450  | 40S ribosomal protein S3                       | 29.2.4 protein.synthesis.elongation        | 5 | 101 |
| TB09.160.2550  | ribosomal protein S7                           | 29.2.4 protein.synthesis.elongation        | 3 | 56  |
| TB11.02.1085   | 40s ribosomal protein S4                       | 29.2.4 protein.synthesis.elongation        | 4 | 74  |
| TB11.46.0001   | 60S acidic ribosomal subunit protein           | 29.2.4 protein.synthesis.elongation        | 4 | 93  |
| TB10.6K15.2050 | 40S ribosomal protein S12                      | 29.2.4 protein.synthesis.elongation        | 3 | 70  |
| TB09.211.0120  | nascent polypeptide associated complex subunit | 29.2.4 protein.synthesis.elongation r      | 2 | 59  |
| TB927.8.1330   | 60S ribosomal protein L7a                      | 29.2.4 protein.synthesis.elongation        | 1 | 54  |
| TB10.70.7020   | 40S ribosomal protein S23                      | 29.2.4 protein.synthesis.elongation        | 1 | 24  |
| TB927.7.1730   | 60S ribosomal protein L7                       | 29.2.4 protein.synthesis.elongation        | 1 | 36  |
| TB10.6K15.0510 | 60S ribosomal protein L22                      | 29.2.4 protein.synthesis.elongation        | 1 | 53  |
| TB09.160.4200  | 60S acidic ribosomal protein                   | 29.2.4 protein.synthesis.elongation        | 2 | 71  |
| TB927.6.4980   | 40S ribosomal protein S14                      | 29.2.4 protein.synthesis.elongation        | 2 | 52  |
| TB11.50.0005   | 60S ribosomal protein L21E                     | 29.2.4 protein.synthesis.elongation        | 1 | 62  |
| TB11.02.4030   | eukaryotic release factor 3                    | 29.2 protein.synthesis                     | 1 | 34  |
| TB11.01.7960   | 60S ribosomal protein L2                       | 29.2.4 protein.synthesis.elongation        | 1 | 52  |
| TB927.7.230    | 40S ribosomal protein S33                      | 29.2.4 protein.synthesis.elongation        | 1 | 32  |
| TB09.160.3670  | ribosomal protein S6                           | 29.2.4 protein.synthesis.elongation        | 1 | 30  |
| TB10.70.3360   | 40S ribosomal protein S3a                      | 29.2.4 protein.synthesis.elongation        | 3 | 57  |
| TB09.211.4850  | 60S ribosomal protein L26                      | 29.2.4 protein.synthesis.elongation        | 1 | 20  |
| TB927.7.1040   | 40S ribosomal protein S16                      | 29.2.4 protein.synthesis.elongation        | 3 | 58  |
| TB927.5.1660   | protein phosphatase 2C                         | 29.4 protein.postranslational modification | 4 | 58  |
| TB10.389.1730  | protein kinase                                 | 29.4 protein.postranslational modification | 3 | 91  |
| TB10.61.2550   | N-myristoyl transferase                        | 29.4 protein.postranslational modification | 1 | 44  |
| TB11.01.8740   | protein phosphatase 2A catalytic subunit       | 29.4 protein.postranslational modification | 1 | 72  |
| TB11.01.0450   | serine/threonine protein phosphatase catalytic | 29.4 protein.postranslational modification | 2 | 69  |
| TB927.1.3200   | phosphatase-like protein                       | 29.4 protein.postranslational modification | 3 | 37  |
| TB11.03.0390   | protein phosphatase 2C                         | 29.4 protein.postranslational modification | 5 | 96  |
| TB10.05.0110   | serine/threonine protein phosphatase type 5    | 29.4 protein.postranslational modification | 1 | 42  |
| TB11.02.4830   | protein kinase                                 | 29.4 protein.postranslational modification | 1 | 27  |

|                |                                            |                                            |    |     |
|----------------|--------------------------------------------|--------------------------------------------|----|-----|
| TB11.46.0003   | protein kinase                             | 29.4 protein.postranslational modification | 1  | 26  |
| TB927.8.7350   | trans-sialidase                            | 29.5 protein.degradation                   | 1  | 72  |
| TB927.5.1880   | ecotin                                     | 29.5 protein.degradation                   | 3  | 55  |
| TB927.7.4070   | calpain-like cysteine peptidase            | 29.5 protein.degradation                   | 6  | 53  |
| TB927.7.6270   | peptidase T                                | 29.5 protein.degradation                   | 1  | 75  |
| TB10.70.6620   | methionine aminopeptidase 2                | 29.5 protein.degradation                   | 6  | 76  |
| TB10.70.7090   | serine carboxypeptidase III precursor      | 29.5 protein.degradation                   | 1  | 110 |
| TB927.7.190    | thimet oligopeptidase A                    | 29.5 protein.degradation                   | 12 | 78  |
| TB927.3.4750   | aminopeptidase, Family M1                  | 29.5 protein.degradation                   | 11 | 104 |
| TB11.52.0003   | oligopeptidase b                           | 29.5 protein.degradation                   | 8  | 110 |
| TB927.8.1610   | major surface protease gp63                | 29.5 protein.degradation                   | 1  | 35  |
| TB10.6K15.2520 | prolyl oligopeptidase                      | 29.5 protein.degradation                   | 27 | 110 |
| TB10.61.1870   | aminopeptidase, Family M24                 | 29.5 protein.degradation                   | 3  | 72  |
| TB11.47.0036   | calpain, family C2                         | 29.5 protein.degradation                   | 2  | 39  |
| TB927.1.2100   | calpain-like cysteine peptidase, family C2 | 29.5 protein.degradation                   | 27 | 107 |
| TB11.02.1070   | aminopeptidase, Family M1                  | 29.5 protein.degradation                   | 22 | 90  |
| TB927.6.1000   | cysteine peptidase, family C1              | 29.5 protein.degradation                   | 1  | 66  |
| TB927.3.3410   | aspartyl aminopeptidase                    | 29.5 protein.degradation                   | 2  | 67  |
| TB11.02.0100   | carboxypeptidase, Family M32               | 29.5 protein.degradation                   | 12 | 93  |
| TB10.61.1210   | methionine aminopeptidase, Family M24      | 29.5 protein.degradation                   | 1  | 59  |
| TB927.6.400    | peptidase M20/M25/M40                      | 29.5 protein.degradation                   | 1  | 70  |
| TB927.7.4060   | calpain-like cysteine peptidase            | 29.5 protein.degradation                   | 1  | 31  |
| TB11.02.4440   | aminopeptidase, Family M17                 | 29.5 protein.degradation                   | 14 | 120 |
| TB927.6.1030   | cysteine peptidase, family C1              | 29.5 protein.degradation                   | 1  | 29  |
| TB927.3.2090   | aminopeptidase P1                          | 29.5 protein.degradation                   | 2  | 81  |
| TB10.389.1480  | cytosolic dipeptidase, M20/M25/M40 family  | 29.5 protein.degradation                   | 9  | 129 |
| TB927.1.2260   | calpain-like protein fragment              | 29.5.3 protein.degradation                 | 1  | 43  |
| TB10.70.0850   | proteasome subunit alpha 1                 | 29.5.11.20 protein.degradation             | 10 | 94  |
| TB11.02.0815   | ubiquitin-conjugating enzyme               | 29.5.11 protein.degradation                | 3  | 63  |
| TB10.100.0170  | proteasome subunit alpha 2                 | 29.5.11.20 protein.degradation             | 5  | 117 |
| TB09.211.0050  | ubiquitin-conjugating enzyme E2            | 29.5.11 protein.degradation                | 3  | 74  |
| TB09.211.2590  | proteasome subunit beta 2                  | 29.5.11.20 protein.degradation             | 4  | 50  |
| TB11.01.1680   | polyubiquitin                              | 29.5.11 protein.degradation                | 1  | 44  |
| TB927.5.1000   | ubiquitin-conjugating enzyme E2            | 29.5.11 protein.degradation                | 1  | 48  |
| TB927.7.4790   | proteasome beta 6 subunit                  | 29.5.11.20 protein.degradation             | 4  | 80  |

|                |                                                |                                      |    |     |
|----------------|------------------------------------------------|--------------------------------------|----|-----|
| TB10.100.0120  | proteasome subunit alpha 5                     | 29.5.11.20 protein.degradation       | 6  | 101 |
| TB10.70.3660   | proteasome activator protein PA26              | 29.5.11.20 protein.degradation       | 7  | 84  |
| TB10.70.2490   | proteasome subunit beta 2                      | 29.5.11.20 protein.degradation       | 4  | 62  |
| TB09.211.1250  | proteasome subunit alpha 1                     | 29.5.11.20 protein.degradation       | 3  | 72  |
| TB11.02.4870   | proteasome subunit alpha 7                     | 29.5.11.20 protein.degradation       | 10 | 99  |
| TB927.7.4420   | proteasome alpha 3 subunit                     | 29.5.11.20 protein.degradation       | 4  | 107 |
| TB927.3.780    | proteasome alpha 7 subunit                     | 29.5.11.20 protein.degradation       | 4  | 91  |
| TB927.6.1260   | proteasome beta-1 subunit                      | 29.5.11.20 protein.degradation       | 3  | 91  |
| TB11.02.5170   | proteasome subunit beta 3                      | 29.5.11.20 protein.degradation       | 1  | 55  |
| TB927.4.430    | proteasome beta 7 subunit                      | 29.5.11.20 protein.degradation       | 1  | 50  |
| TB10.70.0790   | proteasome subunit beta 5                      | 29.5.11.20 protein.degradation       | 6  | 76  |
| TB927.3.5340   | Hsc70-interacting protein (Hip)                | 29.5.11.4.2 protein.degradation      | 5  | 74  |
| TB11.01.2000   | HslVU complex proteolytic subunit              | 29.5 protein.degradation             | 2  | 63  |
| TB927.3.2600   | ATP-dependent DEAD/H RNA helicase              | 27.5* RNA.DEAD/DEAH BOX helicase     | 17 | 73  |
| TB10.70.3290   | ATP-dependent DEAD-box RNA helicase            | 27.5* RNA.DEAD/DEAH BOX helicase     | 1  | 78  |
| TB10.70.7730   | ATP-dependent DEAD/H RNA helicase              | 27.5* RNA.DEAD/DEAH BOX helicase     | 2  | 83  |
| TB09.211.2150  | poly(A)-binding protein 1                      | 27.3 RNA.regulation of transcription | 4  | 69  |
| TB09.211.0560  | DRBD3 RNA-binding protein                      | 27.4 RNA.RNA binding                 | 2  | 70  |
| TB927.8.2740   | mitochondrial RNA binding protein              | 27.4 RNA.RNA binding                 | 7  | 75  |
| TB927.8.740    | nucleolar RNA-binding protein                  | 27.4 RNA.RNA binding                 | 2  | 42  |
| TB11.01.4860   | guide RNA-binding protein                      | 27.4 RNA.RNA binding                 | 4  | 58  |
| TB11.55.0009   | mitochondrial RNA-binding protein 1            | 27.4 RNA.RNA binding                 | 3  | 68  |
| TB11.02.5770   | mitochondrial RNA-binding protein              | 27.4 RNA.RNA binding                 | 3  | 46  |
| TB10.70.5360   | La protein                                     | 27.4 RNA.RNA binding                 | 9  | 78  |
| TB10.6K15.3160 | fibrillarin                                    | 27.1 RNA.processing                  | 1  | 50  |
| TB927.5.1710   | ribonucleoprotein p18, mitochondrial precursor | 27.1 RNA.processing                  | 2  | 37  |
| TB927.6.2700   | small nuclear ribonucleoprotein Sm-E           | 27.1 RNA.processing                  | 1  | 43  |
| TB11.02.0490   | RNA editing complex protein MP46               | 27.1 RNA.processing                  | 1  | 30  |
| TB10.61.1920   | fibrillarin                                    | 27.1 RNA.processing                  | 2  | 35  |
| TB927.4.890    | small nuclear ribonucleoprotein SmD3           | 27.1 RNA.processing                  | 1  | 30  |
| TB927.2.5850   | small nuclear ribonucleoprotein                | 27.1 RNA.processing                  | 1  | 38  |
| TB09.211.1695  | small nuclear ribonucleoprotein Sm-F           | 27.1 RNA.processing                  | 1  | 25  |
| TB927.8.3380   | electron transfer protein                      | 34 transport                         | 1  | 30  |
| TB927.8.5030   | trafficking protein particle complex subunit 3 | 34 transport                         | 1  | 43  |
| TB10.100.0070  | ATP synthase F1 subunit gamma                  | 34.1 transport.p- and v-ATPases      | 7  | 59  |

|                |                                               |                                      |    |     |
|----------------|-----------------------------------------------|--------------------------------------|----|-----|
| TB927.7.7420   | ATP synthase alpha chain                      | 34.1 transport.p- and v-ATPases      | 12 | 83  |
| TB927.3.1380   | ATP synthase beta chain                       | 34.1 transport.p- and v-ATPases      | 8  | 109 |
| TB927.6.4990   | ATP synthase, epsilon chain                   | 34.1 transport.p- and v-ATPases      | 2  | 98  |
| TB927.5.3400   | calcium-translocating P-type ATPase           | 34.1 transport.p- and v-ATPases      | 1  | 20  |
| TB10.389.1170  | P-type H <sup>+</sup> -ATPase                 | 34.1.1 transport.p- and v-ATPases    | 1  | 23  |
| TB927.8.5120   | cytochrome c                                  | 9.7 mitochondrial electron transport | 4  | 67  |
| TB10.70.0830   | CHC clathrin heavy chain                      | 31.4 cell. vesicle transport         | 1  | 28  |
| TB927.3.4680   | RAB GDP dissociation inhibitor alpha          | 31.4 cell. vesicle transport         | 8  | 98  |
| TB10.6K15.3970 | developmentally regulated GTP-binding protein | 31.4 cell. vesicle transport         | 1  | 56  |
| TB927.3.1120   | GTP-binding nuclear protein rtb2              | 31.4 cell. vesicle transport         | 1  | 42  |
| TB927.8.890    | small GTP-binding protein Rab1                | 31.4 cell. vesicle transport         | 3  | 70  |
| TB927.8.4330   | small GTP-binding protein Rab11               | 31.4 cell. vesicle transport         | 2  | 50  |
| TB11.01.5320   | RAB4 small GTPase                             | 31.4 cell. vesicle transport         | 1  | 66  |
| TB10.389.1370  | hypothetical protein                          | 35.1 not assigned.no ontology        | 1  | 38  |
| TB10.6K15.0480 | hypothetical protein                          | 35.1 not assigned.no ontology        | 1  | 40  |
| TB927.8.6760   | IgE-dependent histamine-releasing factor      | 35.2 not assigned.unknown            | 4  | 66  |
| TB927.7.4520   | hypothetical protein                          | 35.1 not assigned.no ontology        | 7  | 87  |
| TB09.211.1690  | hypothetical protein                          | 35.1 not assigned.no ontology        | 5  | 75  |
| TB927.7.6890   | hypothetical protein                          | 35.1 not assigned.no ontology        | 1  | 81  |
| TB927.6.2280   | hypothetical protein                          | 35.1 not assigned.no ontology        | 3  | 72  |
| TB927.4.1380   | hypothetical protein                          | 35.1 not assigned.no ontology        | 1  | 46  |
| TB11.02.2030   | hypothetical protein                          | 35.1 not assigned.no ontology        | 3  | 92  |
| TB10.70.5050   | hypothetical protein                          | 35.1 not assigned.no ontology        | 1  | 59  |
| TB927.7.5210   | hypothetical protein                          | 35.1 not assigned.no ontology        | 1  | 71  |
| TB11.01.7740   | hypothetical protein                          | 35.1 not assigned.no ontology        | 2  | 61  |
| TB11.02.2840   | hypothetical protein                          | 35.1 not assigned.no ontology        | 7  | 74  |
| TB927.7.2650   | hypothetical protein                          | 35.1 not assigned.no ontology        | 1  | 42  |
| TB927.1.180    | retrotransposon hot spot (RHS) protein        | 35.1 not assigned.no ontology        | 14 | 75  |
| TB927.5.1460   | hypothetical protein                          | 35.1 not assigned.no ontology        | 2  | 67  |
| TB927.8.4780   | hypothetical protein                          | 35.1 not assigned.no ontology        | 3  | 63  |
| TB11.02.2520   | hypothetical protein                          | 35.1 not assigned.no ontology        | 7  | 71  |
| TB927.4.2030   | hypothetical protein                          | 35.1 not assigned.no ontology        | 3  | 74  |
| TB927.2.340    | retrotransposon hot spot (RHS) protein        | 35.1 not assigned.no ontology        | 5  | 64  |
| TB10.70.2770   | stress-inducible protein ST11-like            | 35.2 not assigned.unknown            | 9  | 103 |
| TB927.2.470    | retrotransposon hot spot (RHS) protein        | 35.1 not assigned.no ontology        | 11 | 98  |



|               |                                        |                               |    |    |
|---------------|----------------------------------------|-------------------------------|----|----|
| TB927.1.3170  | hypothetical protein                   | 35.1 not assigned.no ontology | 3  | 38 |
| TB927.4.3740  | hypothetical protein                   | 35.1 not assigned.no ontology | 6  | 59 |
| TB927.3.2100  | hypothetical protein                   | 35.1 not assigned.no ontology | 9  | 98 |
| TB927.7.3330  | hypothetical protein                   | 35.1 not assigned.no ontology | 1  | 30 |
| TB11.01.7120  | hypothetical protein                   | 35.1 not assigned.no ontology | 1  | 56 |
| TB11.01.5590  | hypothetical protein                   | 35.1 not assigned.no ontology | 1  | 60 |
| TB10.61.0620  | hypothetical protein                   | 35.1 not assigned.no ontology | 1  | 74 |
| TB10.70.4930  | hypothetical protein                   | 35.1 not assigned.no ontology | 5  | 68 |
| TB927.1.220   | retrotransposon hot spot (RHS) protein | 35.1 not assigned.no ontology | 8  | 65 |
| TB927.6.2090  | hypothetical protein                   | 35.1 not assigned.no ontology | 1  | 31 |
| TB927.2.280   | retrotransposon hot spot (RHS) protein | 35.1 not assigned.no ontology | 7  | 68 |
| TB11.01.5680  | hypothetical protein                   | 35.1 not assigned.no ontology | 2  | 71 |
| TB927.5.2640  | hypothetical protein                   | 35.1 not assigned.no ontology | 1  | 75 |
| TB927.4.380   | hypothetical protein                   | 35.1 not assigned.no ontology | 2  | 46 |
| TB927.4.2240  | hypothetical protein                   | 35.1 not assigned.no ontology | 4  | 57 |
| TB10.61.0540  | hypothetical protein                   | 35.1 not assigned.no ontology | 3  | 59 |
| TB09.160.5100 | hypothetical protein                   | 35.1 not assigned.no ontology | 3  | 55 |
| TB927.3.1030  | hypothetical protein                   | 35.1 not assigned.no ontology | 1  | 28 |
| TB927.3.4040  | hypothetical protein                   | 35.1 not assigned.no ontology | 2  | 65 |
| TB11.55.0024  | hypothetical protein                   | 35.1 not assigned.no ontology | 11 | 85 |
| TB10.70.1490  | hypothetical protein                   | 35.1 not assigned.no ontology | 6  | 80 |
| TB09.160.5530 | hypothetical protein                   | 35.1 not assigned.no ontology | 6  | 77 |
| TB927.7.2990  | hypothetical protein                   | 35.1 not assigned.no ontology | 1  | 29 |
| TB10.70.4130  | hypothetical protein                   | 35.1 not assigned.no ontology | 1  | 30 |
| TB927.7.2980  | hypothetical protein                   | 35.1 not assigned.no ontology | 10 | 67 |
| TB927.2.100   | retrotransposon hot spot (RHS) protein | 35.1 not assigned.no ontology | 2  | 61 |
| TB11.02.0140  | hypothetical protein                   | 35.1 not assigned.no ontology | 1  | 45 |
| TB927.8.1140  | hypothetical protein                   | 35.1 not assigned.no ontology | 1  | 31 |
| TB927.7.7460  | hypothetical protein                   | 35.1 not assigned.no ontology | 4  | 51 |
| TB11.02.0210  | hypothetical protein                   | 35.1 not assigned.no ontology | 5  | 62 |
| TB927.4.1300  | hypothetical protein                   | 35.1 not assigned.no ontology | 17 | 97 |
| TB09.211.4630 | hypothetical protein                   | 35.1 not assigned.no ontology | 1  | 58 |
| TB927.6.4000  | hypothetical protein                   | 35.1 not assigned.no ontology | 5  | 64 |
| TB927.3.5310  | hypothetical protein                   | 35.1 not assigned.no ontology | 1  | 79 |
| TB09.211.3300 | hypothetical protein                   | 35.1 not assigned.no ontology | 1  | 34 |

|               |                                        |                               |    |    |
|---------------|----------------------------------------|-------------------------------|----|----|
| TB927.2.240   | retrotransposon hot spot (RHS) protein | 35.1 not assigned.no ontology | 11 | 68 |
| TB927.1.420   | retrotransposon hot spot (RHS) protein | 35.1 not assigned.no ontology | 2  | 73 |
| TB09.211.1620 | hypothetical protein                   | 35.1 not assigned.no ontology | 9  | 69 |
| TB927.2.1170  | retrotransposon hot spot (RHS) protein | 35.1 not assigned.no ontology | 1  | 36 |
| TB11.02.4950  | hypothetical protein                   | 35.1 not assigned.no ontology | 3  | 39 |
| TB927.4.1220  | leucine-rich repeat protein (LRRP)     | 35 not assigned               | 1  | 70 |
| TB927.5.1160  | hypothetical protein                   | 35.1 not assigned.no ontology | 1  | 31 |
| TB927.2.510   | retrotransposon hot spot (RHS) protein | 35.1 not assigned.no ontology | 1  | 38 |
| TB11.03.0620  | hypothetical protein                   | 35.1 not assigned.no ontology | 1  | 42 |
| TB09.160.2540 | alpha/beta-hydrolase-like protein      | 35.1 not assigned.no ontology | 1  | 97 |
| TB927.1.3390  | hypothetical protein                   | 35.1 not assigned.no ontology | 1  | 60 |
| TB927.5.1280  | hypothetical protein                   | 35.1 not assigned.no ontology | 1  | 24 |
| TB927.2.4580  | hypothetical protein                   | 35.1 not assigned.no ontology | 2  | 89 |
| TB10.70.2180  | hypothetical protein                   | 35.1 not assigned.no ontology | 1  | 32 |
| TB927.2.450   | retrotransposon hot spot (RHS) protein | 35.1 not assigned.no ontology | 2  | 55 |
| TB11.01.7325  | hypothetical protein                   | 35.1 not assigned.no ontology | 2  | 65 |
| TB927.7.6770  | hypothetical protein                   | 35.1 not assigned.no ontology | 1  | 44 |
| TB11.02.2040  | hypothetical protein                   | 35.1 not assigned.no ontology | 4  | 51 |
| TB927.8.6110  | hypothetical protein                   | 35.1 not assigned.no ontology | 1  | 58 |
| TB10.389.1890 | hypothetical protein                   | 35.1 not assigned.no ontology | 1  | 20 |
| TB09.211.2400 | hypothetical protein                   | 35.1 not assigned.no ontology | 1  | 33 |
| TB927.4.5340  | hypothetical protein                   | 35.1 not assigned.no ontology | 1  | 31 |
| TB927.1.120   | retrotransposon hot spot (RHS) protein | 35.1 not assigned.no ontology | 3  | 57 |
| TB927.4.2740  | hypothetical protein                   | 35.1 not assigned.no ontology | 4  | 90 |
| TB10.70.7950  | hypothetical protein                   | 35.1 not assigned.no ontology | 1  | 39 |
| TB11.02.3330  | hypothetical protein                   | 35.1 not assigned.no ontology | 1  | 27 |
| TB927.8.4210  | hypothetical protein                   | 35.1 not assigned.no ontology | 2  | 37 |
| TB10.389.1260 | hypothetical protein                   | 35.1 not assigned.no ontology | 1  | 22 |
| TB11.01.8610  | hypothetical protein                   | 35.1 not assigned.no ontology | 1  | 27 |
| TB927.7.3170  | hypothetical protein                   | 35.1 not assigned.no ontology | 1  | 28 |
| TB927.5.700   | hypothetical protein                   | 35.1 not assigned.no ontology | 1  | 20 |
| TB927.5.2260  | hypothetical protein                   | 35.1 not assigned.no ontology | 4  | 62 |
| TB11.02.0690  | hypothetical protein                   | 35.1 not assigned.no ontology | 1  | 20 |
| TB11.02.2670  | hypothetical protein                   | 35.1 not assigned.no ontology | 1  | 27 |
| TB11.03.0335  | hypothetical protein                   | 35.1 not assigned.no ontology | 1  | 37 |

|                |                                        |                               |   |     |
|----------------|----------------------------------------|-------------------------------|---|-----|
| TB927.4.4660   | hypothetical protein                   | 35.1 not assigned.no ontology | 3 | 77  |
| TB11.47.0016   | hypothetical protein                   | 35.1 not assigned.no ontology | 2 | 48  |
| TB10.6K15.1900 | hypothetical protein                   | 35.1 not assigned.no ontology | 2 | 75  |
| TB927.5.2160   | hypothetical protein                   | 35.1 not assigned.no ontology | 1 | 53  |
| TB11.01.5570   | hypothetical protein                   | 35.1 not assigned.no ontology | 1 | 73  |
| TB927.4.360    | hypothetical protein                   | 35.1 not assigned.no ontology | 1 | 68  |
| TB927.6.2200   | hypothetical protein                   | 35.1 not assigned.no ontology | 3 | 50  |
| TB10.70.1130   | hypothetical protein                   | 35.1 not assigned.no ontology | 5 | 101 |
| TB11.01.5440   | hypothetical protein                   | 35.1 not assigned.no ontology | 1 | 52  |
| TB11.02.0660   | hypothetical protein                   | 35.1 not assigned.no ontology | 1 | 75  |
| TB09.211.3050  | hypothetical protein                   | 35.1 not assigned.no ontology | 1 | 50  |
| TB11.01.8770   | hypothetical protein                   | 35.1 not assigned.no ontology | 7 | 62  |
| TB09.160.4480  | hypothetical protein                   | 35.1 not assigned.no ontology | 2 | 29  |
| TB10.6K15.0290 | hypothetical protein                   | 35.1 not assigned.no ontology | 1 | 53  |
| TB927.5.4470   | hypothetical protein                   | 35.1 not assigned.no ontology | 1 | 21  |
| TB11.01.8390   | hypothetical protein                   | 35.1 not assigned.no ontology | 1 | 27  |
| TB10.6K15.0080 | hypothetical protein                   | 35.1 not assigned.no ontology | 1 | 20  |
| TB11.02.0870   | hypothetical protein                   | 35.1 not assigned.no ontology | 5 | 70  |
| TB09.211.1950  | hypothetical protein                   | 35.1 not assigned.no ontology | 1 | 60  |
| TB927.2.1080   | retrotransposon hot spot (RHS) protein | 35.1 not assigned.no ontology | 9 | 57  |
| TB09.160.0465  | hypothetical protein                   | 35.1 not assigned.no ontology | 1 | 62  |
| TB927.5.2940   | stress-induced protein sti1            | 35.2 not assigned.unknown     | 3 | 80  |
| TB10.26.0680   | hypothetical protein                   | 35.1 not assigned.no ontology | 3 | 44  |
| TB927.3.4880   | hypothetical protein                   | 35.1 not assigned.no ontology | 2 | 64  |
| TB927.4.2040   | hypothetical protein                   | 35.1 not assigned.no ontology | 8 | 75  |
| TB11.01.2120   | hypothetical protein                   | 35.1 not assigned.no ontology | 1 | 25  |
| TB927.3.1010   | hypothetical protein                   | 35.1 not assigned.no ontology | 2 | 54  |
| TB927.5.1360   | hypothetical protein                   | 35.1 not assigned.no ontology | 3 | 46  |
| TB09.142.0100  | variant surface glycoprotein           | 31.99 cell.unspecified        | 1 | 25  |
| TB927.8.4970   | 69 kDa paraflagellar rod protein       | 31.6* cell organization       | 1 | 27  |
| TB927.4.2070   | antigenic protein                      | 31.6* cell organization       | 2 | 77  |
| TB09.160.1200  | mitotubule-associated protein Gb4      | 31.1 cell.organisation        | 2 | 28  |
| TB11.01.3805   | microtubule-associated protein         | 31.1 cell.organisation        | 1 | 53  |
| TB09.211.4511  | kinetoplastid membrane protein KMP-11  | 31.1 cell.organisation        | 2 | 40  |
| TB927.4.3950   | cytoskeleton-associated protein CAP5.5 | 31.1 cell.organisation        | 2 | 42  |

|                |                                                       |                          |    |     |
|----------------|-------------------------------------------------------|--------------------------|----|-----|
| TB11.02.3390   | dynein light chain                                    | 31.1 cell.organisation   | 1  | 69  |
| TB10.6K15.1160 | G-actin binding protein                               | 31.6* cell organization  | 3  | 103 |
| TB11.01.2530   | kinesin-like protein                                  | 31.1 cell.organisation   | 3  | 64  |
| TB927.1.2340   | alpha tubulin                                         | 31.1 cell.organisation   | 10 | 133 |
| TB927.3.4290   | 73 kDa paraflagellar rod protein                      | 31.1 cell.organisation   | 5  | 54  |
| TB10.406.0560  | microtubule-associated protein                        | 31.1 cell.organisation   | 5  | 50  |
| TB927.1.2330   | beta tubulin                                          | 31.1 cell.organisation   | 9  | 77  |
| TB10.406.0650  | microtubule-associated protein                        | 31.1 cell.organisation   | 3  | 74  |
| TB927.6.2420   | p22 protein precursor                                 | 31.1 cell.organisation   | 3  | 42  |
| TB927.7.3440   | I/6 autoantigen                                       | 31.1 cell.organisation   | 1  | 70  |
| TB09.211.0620  | actin A                                               | 31.1 cell.organisation   | 1  | 36  |
| TB927.3.5180   | cofilin/actin depolymerizing factor                   | 31.1 cell.organisation   | 2  | 59  |
| TB09.211.0740  | p21 antigen protein                                   | 31.6* cell organization  | 2  | 65  |
| TB927.6.3740   | heat shock 70 kDa protein                             | 29.6 protein.(un)folding | 10 | 110 |
| TB927.7.710    | heat shock 70 kDa protein                             | 29.6 protein.(un)folding | 6  | 61  |
| TB10.6K15.2290 | protein disulfide isomerase                           | 29.6 protein.(un)folding | 3  | 72  |
| TB09.211.1350  | peptidyl-prolyl cis-trans isomerase (cyclophilin- 40) | 29.6 protein.(un)folding | 7  | 90  |
| TB11.01.8510   | t-complex protein 1 subunit alpha                     | 29.6 protein.(un)folding | 4  | 70  |
| TB11.02.0750   | t-complex protein 1 subunit zeta                      | 29.6 protein.(un)folding | 2  | 80  |
| TB10.70.0280   | chaperonin Hsp60                                      | 29.6 protein.(un)folding | 9  | 112 |
| TB10.70.7050   | t-complex protein 1 subunit delta                     | 29.6 protein.(un)folding | 5  | 55  |
| TB927.2.1560   | cyclophilin type peptidyl-prolyl cis-trans isomerase  | 29.6 protein.(un)folding | 1  | 59  |
| TB927.7.280    | cyclophilin-type peptidyl-prolyl cis-trans isomerase  | 29.6 protein.(un)folding | 1  | 27  |
| TB927.6.2170   | co-chaperone GrpE, putative                           | 29.6 protein.(un)folding | 4  | 67  |
| TB10.389.0880  | heat shock protein                                    | 29.6 protein.(un)folding | 16 | 92  |
| TB11.01.3110   | heat shock protein 70                                 | 29.6 protein.(un)folding | 33 | 106 |
| TB10.26.1080   | heat shock protein 83                                 | 29.6 protein.(un)folding | 27 | 93  |
| TB927.8.2000   | cyclophilin type peptidyl-prolyl cis-trans isomerase  | 29.6 protein.(un)folding | 1  | 36  |
| TB927.3.3330   | heat shock protein 20                                 | 29.6 protein.(un)folding | 3  | 95  |
| TB927.7.2590   | prefoldin                                             | 29.6 protein.(un)folding | 2  | 79  |
| TB927.7.4770   | cyclophilin-type peptidyl-prolyl cis-trans isomerase  | 29.6 protein.(un)folding | 2  | 60  |
| TB927.7.1320   | 10 kDa heat shock protein                             | 29.6 protein.(un)folding | 1  | 37  |
| TB11.02.5450   | glucose-regulated protein 78                          | 29.6 protein.(un)folding | 15 | 113 |
| TB927.7.1300   | protein disulfide isomerase                           | 29.6 protein.(un)folding | 6  | 81  |
| TB927.7.570    | prefoldin                                             | 29.6 protein.(un)folding | 5  | 58  |

|                |                                                      |                                  |    |     |
|----------------|------------------------------------------------------|----------------------------------|----|-----|
| TB927.7.5790   | protein disulfide isomerase                          | 29.6 protein.(un)folding         | 1  | 43  |
| TB09.211.2850  | cyclophilin type peptidyl-prolyl cis-trans isomerase | 29.6 protein.(un)folding         | 1  | 42  |
| TB11.03.0250   | cyclophilin A                                        | 29.6 protein.(un)folding         | 6  | 98  |
| TB10.6K15.2330 | t-complex protein 1 subunit theta                    | 29.6 protein.(un)folding         | 2  | 74  |
| TB10.61.0180   | peptidylprolyl isomerase-like protein                | 29.6 protein.(un)folding         | 3  | 74  |
| TB11.01.3080   | heat shock protein 70                                | 29.6 protein.(un)folding         | 2  | 87  |
| TB927.7.4480   | adenosine 5'-monophosphoramidase                     | 23 nucleotide metabolism         | 4  | 63  |
| TB927.8.5630   | dihydroorotase                                       | 23.2 nucleotide metabolism.      | 2  | 54  |
| TB10.70.5150   | adenylate kinase                                     | 23.1.2 nucleotide metabolism.    | 2  | 52  |
| TB927.7.1780   | adenine phosphoribosyltransferase                    | 23 nucleotide metabolism         | 1  | 82  |
| TB09.211.0350  | adenylate kinase                                     | 23.1.2 nucleotide metabolism.    | 5  | 57  |
| TB927.8.4430   | nucleoside phosphorylase                             | 23 nucleotide metabolism         | 5  | 86  |
| TB927.6.2360   | adenosine kinase                                     | 23 nucleotide metabolism         | 7  | 87  |
| TB11.01.7800   | nucleoside diphosphate kinase                        | 23 nucleotide metabolism         | 5  | 89  |
| TB10.26.0200   | guanylate kinase                                     | 23.1.2 nucleotide metabolism.    | 7  | 70  |
| TB927.4.3320   | uracil phosphoribosyltransferase                     | 23.3.1.3 nucleotide metabolism   | 4  | 80  |
| TB09.160.4620  | inositol-1(or 4)-monophosphatase                     | 23.2 nucleotide metabolism       | 1  | 61  |
| TB927.5.3830   | dihydroorotate dehydrogenase                         | 23.2 nucleotide metabolism.      | 3  | 88  |
| TB10.6K15.0970 | phosphoribosylpyrophosphate synthetase               | 23 nucleotide metabolism         | 1  | 47  |
| TB10.70.6660   | hypoxanthine-guanine phosphoribosyltransferase       | 23.1.2 nucleotide metabolism.    | 4  | 84  |
| TB11.V4.0004   | ribonucleoside-diphosphate reductase small chain     | 23 nucleotide metabolism         | 6  | 83  |
| TB927.7.4570   | nucleoside hydrolase                                 | 23 nucleotide metabolism         | 11 | 78  |
| TB927.6.3650   | ADP-ribosylation factor                              | 23 nucleotide metabolism         | 3  | 78  |
| TB927.3.2960   | inosine-adenosine-guanosine-nucleoside hydrolase     | 23 nucleotide metabolism         | 8  | 78  |
| TB927.7.5160   | deoxyuridine triphosphatase                          | 23 nucleotide metabolism         | 1  | 84  |
| TB927.5.4560   | guanine deaminase                                    | 23.2 nucleotide metabolism.      | 1  | 83  |
| TB10.70.6540   | hypoxanthine-guanine phosphoribosyltransferase       | 23.1.2 nucleotide metabolism.    | 4  | 51  |
| TB09.211.4460  | ADP-ribosylation factor                              | 23 nucleotide metabolism         | 5  | 72  |
| TB927.7.2100   | GMP synthase                                         | 23.1.2.31 nucleotide metabolism. | 9  | 90  |
| TB927.3.3450   | ADP-ribosylation factor-like protein 3A              | 23 nucleotide metabolism         | 4  | 92  |
| TB11.02.1120   | adenylosuccinate synthetase                          | 23.1.2 nucleotide metabolism.    | 8  | 77  |
| TB09.160.3710  | proliferative cell nuclear antigen                   | 31.3 cell.cycle                  | 4  | 99  |
| TB11.02.3990   | S-phase kinase-associated protein                    | 31.3 cell.cycle                  | 1  | 33  |
| TB927.8.6750   | translationally controlled tumor protein             | 31.3 cell.cycle                  | 4  | 72  |
| TB11.02.2310   | prostaglandin f synthase                             | 30.99 signalling.unspecified     | 14 | 125 |

|               |                                                       |                                        |    |     |
|---------------|-------------------------------------------------------|----------------------------------------|----|-----|
| TB09.211.2360 | protein kinase A catalytic subunit isoform 2          | 30 signalling                          | 4  | 71  |
| TB927.2.2130  | small GTP-binding protein                             | 30.5 signalling.G-proteins             | 1  | 47  |
| TB927.2.5060  | GTP binding protein                                   | 30.5 signalling.G-proteins             | 1  | 34  |
| TB09.211.2330 | small GTPase                                          | 30.5 signalling.G-proteins             | 3  | 44  |
| TB11.01.3170  | guanine nucleotide-binding protein subunit beta       | 30.5 signalling.G-proteins             | 14 | 100 |
| TB927.3.5550  | small GTP-binding protein                             | 30.5 signalling.G-proteins             | 1  | 62  |
| TB927.8.7410  | calreticulin                                          | 30.3 signaling.calcium                 | 9  | 96  |
| TB09.160.4520 | calmodulin                                            | 30.3 signalling.calcium                | 1  | 39  |
| TB927.8.5440  | flagellar calcium-binding protein TB-24               | 30.3 signalling.calcium                | 1  | 61  |
| TB10.61.3180  | calcium-dependent lipid binding protein               | 30.3 signalling.calcium                | 1  | 38  |
| TB11.01.4621  | calmodulin                                            | 30.3 signalling.calcium                | 2  | 57  |
| TB09.211.2540 | calmodulin-like protein                               | 30.3 signalling.calcium                | 2  | 34  |
| TB927.4.5010  | calreticulin                                          | 30.3 signaling.calcium                 | 3  | 86  |
| TB11.01.1290  | 14-3-3-like protein                                   | 30.7 signalling.14-3-3 proteins        | 10 | 82  |
| TB11.02.4700  | 14-3-3-like protein                                   | 30.7 signalling.14-3-3 proteins        | 6  | 70  |
| TB927.5.950   | thioredoxin-like protein                              | 21.5 redox.peroxiredoxins              | 1  | 76  |
| TB927.7.1140  | trypanothione/tryparedoxin dependent peroxidase 3     | 21.5 redox.peroxiredoxins              | 1  | 20  |
| TB927.7.1130  | trypanothione/tryparedoxin dependent peroxidase 2     | 21.5 redox.peroxiredoxins              | 5  | 83  |
| TB927.3.3760  | tryparedoxin                                          | 21.5 redox.peroxiredoxins              | 4  | 72  |
| TB10.406.0520 | trypanothione reductase                               | 21.2 redox.ascorbate and glutathione   | 12 | 117 |
| TB11.47.0012  | glutaredoxin                                          | 21.4 redox.glutaredoxins               | 1  | 38  |
| TB927.2.4370  | trypanothione synthetase                              | 21.2 redox.ascorbate and glutathione   | 13 | 76  |
| TB09.160.4250 | tryparedoxin peroxidase                               | 21.5 redox.peroxiredoxins              | 7  | 72  |
| TB11.01.7550  | iron superoxide dismutase                             | 21.6 redox.dismutases and catalases    | 5  | 79  |
| TB927.5.3350  | iron superoxide dismutase                             | 21.6 redox.dismutases and catalases    | 4  | 64  |
| TB11.01.6660  | iron superoxide dismutase                             | 21.6 redox.dismutases and catalases    | 3  | 42  |
| TB927.8.1990  | tryparedoxin peroxidase                               | 21.5 redox.peroxiredoxins              | 10 | 86  |
| TB927.7.2700  | NADH-cytochrome b5 reductase                          | 21.99 redox.misc                       | 5  | 60  |
| TB927.7.2710  | NADH-cytochrome b5 reductase                          | 21.99 redox.misc                       | 5  | 69  |
| TB927.5.1470  | NADH-cytochrome b5 reductase                          | 21.99 redox.misc                       | 7  | 74  |
| TB927.8.2210  | pteridine reductase                                   | 21 redox                               | 2  | 58  |
| TB10.406.0330 | histone H2B                                           | 28.1 DNA.synthesis/chromatin structure | 2  | 81  |
| TB10.70.0800  | universal minicircle sequence binding protein (UMSBP) | 28.1 DNA.synthesis/chromatin structure | 2  | 91  |
| TB927.7.7040  | methylthioadenosine phosphorylase                     | 28.1 DNA.synthesis/chromatin structure | 8  | 64  |
| TB927.5.1700  | replication Factor A 28 kDa subunit                   | 28.1 DNA.synthesis/chromatin structure | 3  | 64  |

TB10.70.0820 universal minicircle sequence binding protein (UMSBP) 28.1 DNA.synthesis/chromatin structure

2

107

**SHEET 2**

**Non-redundant list of proteins found in Stib 215 secretome**

| Accession number | Protein names                                         | Functional categories              | Number of matched peptides | Highest score |
|------------------|-------------------------------------------------------|------------------------------------|----------------------------|---------------|
| TB927.6.2740     | pyridoxal kinase                                      | 18.20* vitamine metabolism         | 12                         | 87            |
| TB11.01.1820     | biotin--acetyl-CoA-carboxylase ligase                 | 18 vitamine metabolism             | 6                          | 77            |
| TB927.6.1080     | hydroxyacylglutathione hydrolase                      | 24.1 Biodegradation of Xenobiotics | 3                          | 59            |
| TB927.3.3900     | carnitine O-palmitoyltransferase II                   | 11 lipid metabolism                | 14                         | 75            |
| TB09.211.3550    | glycerol kinase glycosomal                            | 11.5 lipid metabolism              | 9                          | 89            |
| TB927.8.3530     | glycerol-3-phosphate dehydrogenase [NAD+], glycosomal | 11.5.2 lipid metabolism            | 12                         | 105           |
| TB927.8.6170     | transketolase                                         | 11.1.31 lipid metabolism           | 14                         | 112           |
| TB927.1.4830     | phospholipase A1                                      | 11.9.3 lipid metabolism            | 1                          | 85            |
| TB927.8.1440     | maoC-like dehydratase                                 | 11.8 lipid metabolism              | 5                          | 79            |
| TB927.8.7100     | acetyl-CoA carboxylase                                | 11.1.1 lipid metabolism            | 3                          | 78            |
| TB927.8.6390     | lysophospholipase                                     | 11.9.3 lipid metabolism            | 2                          | 56            |
| TB927.8.2540     | 3-ketoacyl-CoA thiolase                               | 11.9.4.5 lipid metabolism          | 2                          | 62            |
| TB11.01.8470     | dihydrolipoyl dehydrogenase                           | 11.1.31 lipid metabolism           | 5                          | 69            |
| TB09.160.2780    | fatty acyl CoA synthetase 2                           | 11 lipid metabolism                | 1                          | 30            |
| TB927.2.4930     | esterase                                              | 11.9.2 lipid metabolism            | 4                          | 43            |
| TB927.7.7420     | ATP synthase alpha chain                              | 34.1 transport.p- and v-ATPases    | 14                         | 66            |
| TB10.389.1170    | P-type H+-ATPase                                      | 34.1.1 transport.p- and v-ATPases  | 1                          | 64            |
| TB09.244.2570    | calcium motive p-type ATPase                          | 34.1 transport.p- and v-ATPases    | 3                          | 60            |
| TB927.4.1080     | V-type ATPase, A subunit                              | 34.1 transport.p- and v-ATPases    | 1                          | 48            |
| TB10.389.1180    | P-type H+-ATPase                                      | 34.1.1 transport.p- and v-ATPases  | 7                          | 81            |
| TB927.3.1380     | ATP synthase beta chain                               | 34.1 transport.p- and v-ATPases    | 8                          | 88            |
| TB10.70.0830     | clathrin heavy chain                                  | 31.4 cell. vesicle transport       | 5                          | 86            |
| TB09.160.4680    | Rab geranylgeranyl transferase component A            | 31.4 cell. vesicle transport       | 1                          | 105           |
| TB927.8.890      | small GTP-binding protein Rab1                        | 31.4 cell. vesicle transport       | 3                          | 61            |
| TB10.6K15.3970   | developmentally regulated GTP-binding protein         | 31.4 cell. vesicle transport       | 1                          | 58            |
| TB927.2.5060     | GTP binding protein                                   | 31.4 cell. vesicle transport       | 4                          | 70            |
| TB11.02.5380     | exosome complex exonuclease RRP44p-like protein       | 31.4 cell. vesicle transport       | 1                          | 70            |



|                |                                               |                                                              |    |     |
|----------------|-----------------------------------------------|--------------------------------------------------------------|----|-----|
| TB927.8.4330   | small GTP-binding protein Rab11               | 31.4 cell. vesicle transport                                 | 1  | 32  |
| TB10.70.4720   | importin subunit beta-1                       | 34 transport                                                 | 4  | 102 |
| TB10.6K15.2840 | protein transport protein Sec23A              | 34 transport                                                 | 1  | 52  |
| TB10.6K15.2020 | glucose transporter 2A                        | 34.2 transporter.sugars                                      | 4  | 70  |
| TB927.6.1520   | aquaporin 3                                   | 34.19.1 transport                                            | 1  | 33  |
| TB09.160.4560  | arginine kinase                               | 13.1.1 amino acid metabolism                                 | 17 | 80  |
| TB11.01.1350   | S-adenosylhomocysteine hydrolase              | 13.2.3.4 amino acid metabolism                               | 3  | 74  |
| TB927.7.1110   | asparagine synthetase a                       | 13.1.1 amino acid metabolism                                 | 7  | 66  |
| TB927.5.3820   | aspartate carbamoyltransferase                | 13.1.1.2 amino acid metabolism                               | 11 | 92  |
| TB927.7.4390   | threonine synthase                            | 13.2 amino acid metabolism                                   | 1  | 50  |
| TB927.6.2790   | L-threonine 3-dehydrogenase                   | 13.2 amino acid metabolism                                   | 14 | 107 |
| TB11.02.5400   | cystathionine beta-synthase                   | 13.1.2.3.11 amino acid metabolism                            | 13 | 73  |
| TB09.160.4590  | arginine kinase                               | 13.1.1 amino acid metabolism                                 | 5  | 56  |
| TB09.160.4310  | glutamate dehydrogenase                       | 13 amino acid metabolism                                     | 10 | 93  |
| TB09.211.3330  | cystathione gamma lyase                       | 13.1.1 amino acid metabolism                                 | 8  | 100 |
| TB927.5.3800   | carbamoyl phosphate synthase                  | 13.1.2.3.11 amino acid metabolism                            | 27 | 74  |
| TB927.6.4840   | S-adenosylmethionine synthetase               | 13.1.3.4 amino acid metabolism                               | 16 | 85  |
| TB10.389.1810  | kynurenine aminotransferase                   | 13.1.1.2 amino acid metabolism                               | 12 | 90  |
| TB09.160.4570  | arginine kinase                               | 13.1.1 amino acid metabolism                                 | 14 | 82  |
| TB09.160.1950  | acidocalcisomal exopolyphosphatase            | 13.1.5.1.3 amino acid metabolism                             | 4  | 71  |
| TB09.160.0810  | kynureninase                                  | 13.1.1 amino acid metabolism                                 | 2  | 49  |
| TB11.02.2740   | aspartate aminotransferase mitochondrial      | 13.1.1.2 amino acid metabolism                               | 1  | 49  |
| TB927.7.5920   | mercaptopyruvate sulfurtransferase            | 13.2.5.3 amino acid metabolism                               | 1  | 52  |
| TB10.70.4280   | delta-1-pyrroline-5-carboxylate dehydrogenase | 13.2.2.2 amino acid metabolism                               | 4  | 42  |
| TB927.2.4590   | branched-chain amino acid aminotransferase    | 13 amino acid metabolism                                     | 2  | 60  |
| TB927.7.2440   | pyrroline-5-carboxylate reductase             | 13.2.2.2 amino acid metabolism                               | 1  | 36  |
| TB11.01.0420   | protein transport protein Sec13               | 29.3.4.4 protein.targeting.secretory pathway.plasma membrane | 1  | 79  |
| TB10.70.1190   | valosin-containing protein homolog            | 29.3 protein.targeting                                       | 2  | 79  |
| TB927.8.1600   | lysyl-tRNA synthetase                         | 29.1 protein.aa activation                                   | 3  | 92  |
| TB10.6K15.1220 | isoleucyl-tRNA synthetase                     | 29.1 protein.aa activation                                   | 39 | 85  |
| TB11.02.1210   | leucyl-tRNA synthetase                        | 29.1 protein.aa activation                                   | 35 | 126 |
| TB927.7.2400   | tyrosyl-tRNA synthetase                       | 29.1 protein.aa activation                                   | 6  | 102 |
| TB927.6.700    | alanyl-tRNA synthetase                        | 29.1 protein.aa activation                                   | 23 | 94  |
| TB11.01.1400   | glycyl-tRNA synthetase                        | 29.1 protein.aa activation                                   | 2  | 84  |
| TB10.389.0630  | prolyl-tRNA synthetase                        | 29.1 protein.aa activation                                   | 10 | 88  |

|               |                                             |                                                           |    |     |
|---------------|---------------------------------------------|-----------------------------------------------------------|----|-----|
| TB11.46.0008  | arginyl-tRNA synthetase                     | 29.1 protein.aa activation                                | 32 | 83  |
| TB927.8.5330  | tyrosyl/methionyl-tRNA synthetase           | 29.1 protein.aa activation                                | 4  | 86  |
| TB927.5.1090  | threonyl-tRNA synthetase                    | 29.1 protein.aa activation                                | 1  | 70  |
| TB09.160.3730 | glutaminyl-tRNA synthetase                  | 29.1 protein.aa activation                                | 8  | 70  |
| TB10.70.6470  | methionyl-tRNA synthetase                   | 29.1 protein.aa activation                                | 16 | 85  |
| TB927.4.2310  | asparaginyl-tRNA synthetase                 | 29.1 protein.aa activation                                | 17 | 90  |
| TB11.22.0005  | phenylalanyl-tRNA synthetase                | 29.1 protein.aa activation                                | 1  | 48  |
| TB927.6.1880  | aspartyl-tRNA synthetase                    | 29.1 protein.aa activation                                | 1  | 63  |
| TB927.7.3620  | tyrosyl-tRNA synthetase                     | 29.1 protein.aa activation                                | 4  | 65  |
| TB927.6.4590  | glutamyl-tRNA synthetase                    | 29.1 protein.aa activation                                | 7  | 111 |
| TB927.6.4480  | valyl-tRNA synthetase                       | 29.1 protein.aa activation                                | 29 | 79  |
| TB927.7.4970  | glutamine synthetase                        | 12.2.2 N-metabolism.ammonia metabolism.glutamine synthase | 6  | 73  |
| TB09.V1.0380  | spermidine synthase                         | 22.1.7 polyamine metabolism.synthesis.spermine synthase   | 13 | 76  |
| TB09.160.0770 | nitrilase                                   | 22.1.5 polyamine metabolism                               | 14 | 68  |
| TB11.02.1085  | 40s ribosomal protein S4                    | 29.2.4 protein.synthesis.elongation                       | 10 | 97  |
| TB10.70.2650  | elongation factor 2                         | 29.2.4 protein.synthesis.elongation                       | 37 | 122 |
| TB11.01.2560  | 40S ribosomal protein SA                    | 29.2.4 protein.synthesis.elongation                       | 3  | 92  |
| TB09.160.3270 | eukaryotic initiation factor 4a             | 29.2 protein.synthesis                                    | 11 | 72  |
| TB09.211.4550 | 60S ribosomal protein L12                   | 29.2.4 protein.synthesis.elongation                       | 3  | 49  |
| TB10.70.5680  | elongation factor 1-alpha                   | 29.2.4 protein.synthesis.elongation                       | 4  | 68  |
| TB09.211.0110 | 60S ribosomal protein L10                   | 29.2.4 protein.synthesis.elongation                       | 5  | 75  |
| TB927.6.5120  | 60S acidic ribosomal protein P2             | 29.2.4 protein.synthesis.elongation                       | 3  | 60  |
| TB09.244.2730 | 60S ribosomal protein L5                    | 29.2.4 protein.synthesis.elongation                       | 7  | 73  |
| TB11.01.4660  | elongation factor 1 gamma                   | 29.2.4 protein.synthesis.elongation                       | 5  | 73  |
| TB09.244.2630 | 40S ribosomal protein S6                    | 29.2.4 protein.synthesis.elongation                       | 1  | 65  |
| TB10.70.1100  | translation elongation factor 1-beta        | 29.2.4 protein.synthesis.elongation                       | 1  | 77  |
| TB09.160.3670 | ribosomal protein S6                        | 29.2.4 protein.synthesis.elongation                       | 2  | 50  |
| TB11.02.4000  | 40S ribosomal protein S15a                  | 29.2.4 protein.synthesis.elongation                       | 1  | 47  |
| TB10.05.0220  | 60S ribosomal protein L10a                  | 29.2.4 protein.synthesis.elongation                       | 4  | 82  |
| TB09.160.4200 | 60S acidic ribosomal protein                | 29.2.4 protein.synthesis.elongation                       | 2  | 77  |
| TB10.70.3360  | 40S ribosomal protein S3a                   | 29.2.4 protein.synthesis.elongation                       | 8  | 102 |
| TB10.61.1960  | 40S ribosomal protein S2                    | 29.2.4 protein.synthesis.elongation                       | 3  | 49  |
| TB11.02.4030  | eukaryotic release factor 3                 | 29.2 protein.synthesis                                    | 3  | 73  |
| TB927.4.3550  | 60S ribosomal protein L13a                  | 29.2.4 protein.synthesis.elongation                       | 3  | 55  |
| TB11.03.0410  | eukaryotic translation initiation factor 5a | 29.2 protein.synthesis                                    | 4  | 71  |

|                |                                                |                                              |    |     |
|----------------|------------------------------------------------|----------------------------------------------|----|-----|
| TB10.70.5650   | elongation factor 1-alpha                      | 29.2.4 protein.synthesis.elongation          | 1  | 69  |
| TB927.8.550    | peptide methionine sulfoxide reductase         | 29.11* protein.methione sulfoxide reductases | 2  | 56  |
| TB09.211.0120  | nascent polypeptide associated complex subunit | 29.2.4 protein.synthesis.elongation          | 2  | 47  |
| TB09.160.5580  | 60S ribosomal protein L11                      | 29.2.4 protein.synthesis.elongation          | 1  | 81  |
| TB10.70.7695   | 40S ribosomal protein S11                      | 29.2.4 protein.synthesis.elongation          | 1  | 54  |
| TB927.6.4980   | 40S ribosomal protein S14                      | 29.2.4 protein.synthesis.elongation          | 2  | 63  |
| TB11.50.0005   | 60S ribosomal protein L21E                     | 29.2.4 protein.synthesis.elongation          | 1  | 30  |
| TB927.4.3570   | translation elongation factor 1-beta           | 29.2.4 protein.synthesis.elongation          | 3  | 69  |
| TB10.70.1770   | eukaryotic translation initiation factor 6     | 29.2 protein.synthesis                       | 6  | 87  |
| TB11.01.7535   | 60S ribosomal protein L27                      | 29.2.4 protein.synthesis.elongation          | 2  | 31  |
| TB10.70.1730   | 40S ribosomal protein S18                      | 29.2.4 protein.synthesis.elongation          | 4  | 54  |
| TB11.01.7960   | 60S ribosomal protein L2                       | 29.2.4 protein.synthesis.elongation          | 2  | 68  |
| TB927.5.1820   | 60S acidic ribosomal protein                   | 29.2.4 protein.synthesis.elongation          | 1  | 86  |
| TB09.211.4850  | 60S ribosomal protein L26                      | 29.2.4 protein.synthesis.elongation          | 1  | 43  |
| TB09.160.4450  | 40S ribosomal protein S3                       | 29.2.4 protein.synthesis.elongation          | 4  | 102 |
| TB10.26.0560   | 60S ribosomal protein L6                       | 29.2.4 protein.synthesis.elongation          | 4  | 100 |
| TB927.7.1040   | 40S ribosomal protein S16                      | 29.2.4 protein.synthesis.elongation          | 2  | 64  |
| TB11.46.0001   | 60S acidic ribosomal subunit                   | 29.2.4 protein.synthesis.elongation          | 5  | 81  |
| TB10.6K15.2050 | 40S ribosomal protein S12                      | 29.2.4 protein.synthesis.elongation          | 6  | 56  |
| TB927.7.190    | thimet oligopeptidase A, Family M3             | 29.5 protein.degradation                     | 15 | 82  |
| TB11.52.0003   | oligopeptidase b; family S9A-like protein      | 29.5 protein.degradation                     | 18 | 92  |
| TB927.3.2090   | aminopeptidase P1                              | 29.5 protein.degradation                     | 19 | 95  |
| TB927.7.4070   | calpain-like cysteine peptidase                | 29.5 protein.degradation                     | 6  | 59  |
| TB10.6K15.2520 | prolyl oligopeptidase, family S9A              | 29.5 protein.degradation                     | 18 | 95  |
| TB11.02.0070   | aminopeptidase, Family M17                     | 29.5 protein.degradation                     | 10 | 97  |
| TB927.6.400    | peptidase M20/M25/M40                          | 29.5 protein.degradation                     | 8  | 87  |
| TB927.7.6270   | peptidase T                                    | 29.5 protein.degradation                     | 6  | 84  |
| TB10.61.1870   | aminopeptidase, Family M24                     | 29.5 protein.degradation                     | 10 | 59  |
| TB927.8.7020   | metallo-peptidase, Family M16                  | 29.5 protein.degradation                     | 19 | 77  |
| TB927.8.8330   | calpain                                        | 29.5 protein.degradation                     | 1  | 83  |
| TB927.1.2100   | calpain-like cysteine peptidase, family C2     | 29.5 protein.degradation                     | 23 | 82  |
| TB927.8.1860   | pitrilysin-like metalloprotease; Family M16C   | 29.5 protein.degradation                     | 2  | 82  |
| TB11.02.1070   | aminopeptidase, Family M1                      | 29.5 protein.degradation                     | 30 | 131 |
| TB927.3.4750   | aminopeptidase, Family M1                      | 29.5 protein.degradation                     | 12 | 101 |

|               |                                                        |                                            |    |     |
|---------------|--------------------------------------------------------|--------------------------------------------|----|-----|
| TB10.389.1480 | cytosolic nonspecific dipeptidase, M20/M25/M40 family  | 29.5 protein.degradation                   | 11 | 123 |
| TB927.7.4060  | calpain-like cysteine peptidase                        | 29.5 protein.degradation                   | 2  | 31  |
| TB10.70.6620  | methionine aminopeptidase 2, Family M24                | 29.5 protein.degradation                   | 3  | 63  |
| TB09.160.5550 | calpain-like cysteine peptidase, family C2             | 29.5 protein.degradation                   | 2  | 34  |
| TB09.211.4330 | aminopeptidase P, Family M24                           | 29.5 protein.degradation                   | 1  | 96  |
| TB10.61.1210  | methionine aminopeptidase, Family M24                  | 29.5 protein.degradation                   | 3  | 78  |
| TB11.57.0008  | calpain-like protein                                   | 29.5 protein.degradation                   | 5  | 54  |
| TB927.5.1730  | ecotin                                                 | 29.5 protein.degradation                   | 1  | 37  |
| TB09.211.3610 | ubiquitin-activating enzyme E1                         | 29.5.11 protein.degradation                | 17 | 112 |
| TB11.02.0815  | ubiquitin-conjugating enzyme                           | 29.5.11 protein.degradation                | 7  | 65  |
| TB10.70.3660  | proteasome activator protein PA26                      | 29.5.11.20 protein.degradation             | 1  | 80  |
| TB09.211.0050 | ubiquitin-conjugating enzyme E2                        | 29.5.11 protein.degradation                | 3  | 51  |
| TB11.02.4870  | proteasome subunit alpha 7                             | 29.5.11.20 protein.degradation             | 9  | 94  |
| TB927.3.4840  | ubiquitin hydrolase, putative                          | 29.5.11 protein.degradation                | 9  | 73  |
| TB10.100.0170 | proteasome subunit alpha 2                             | 29.5.11.20 protein.degradation             | 6  | 81  |
| TB10.70.0850  | proteasome subunit alpha 1                             | 29.5.11.20 protein.degradation             | 5  | 82  |
| TB927.8.2640  | ubiquitin-activating enzyme E1                         | 29.5.11 protein.degradation                | 18 | 83  |
| TB927.3.780   | proteasome alpha 7 subunit                             | 29.5.11.20 protein.degradation             | 5  | 79  |
| TB11.01.1680  | polyubiquitin                                          | 29.5.11 protein.degradation                | 1  | 32  |
| TB09.211.1250 | proteasome subunit alpha 1                             | 29.5.11.20 protein.degradation             | 3  | 70  |
| TB927.7.4790  | proteasome beta 6 subunit                              | 29.5.11.20 protein.degradation             | 2  | 69  |
| TB927.5.3210  | small ubiquitin protein                                | 29.5.11 protein.degradation                | 2  | 73  |
| TB927.8.5210  | cullin                                                 | 29.5.11.4.3.3 protein.degradation          | 1  | 23  |
| TB09.211.2590 | proteasome subunit beta 2                              | 29.5.11.20 protein.degradation             | 4  | 58  |
| TB927.4.2710  | ubiquitin-conjugating enzyme E2                        | 29.5.11 protein.degradation                | 1  | 41  |
| TB927.5.1000  | ubiquitin-conjugating enzyme E2                        | 29.5.11 protein.degradation                | 3  | 71  |
| TB10.100.0120 | proteasome subunit alpha 5                             | 29.5.11.20 protein.degradation             | 4  | 66  |
| TB11.01.5790  | ubiquitin-conjugating enzyme E2                        | 29.5.11 protein.degradation                | 1  | 41  |
| TB927.7.4420  | proteasome alpha 3 subunit                             | 29.5.11.20 protein.degradation             | 8  | 72  |
| TB927.6.1260  | proteasome beta-1 subunit                              | 29.5.11.20 protein.degradation             | 2  | 56  |
| TB927.4.3620  | serine/threonine-protein phosphatase PP1               | 29.4 protein.postranslational modification | 3  | 58  |
| TB11.01.8740  | protein phosphatase 2A catalytic subunit               | 29.4 protein.postranslational modification | 6  | 85  |
| TB11.01.0450  | serine/threonine protein phosphatase catalytic subunit | 29.4 protein.postranslational modification | 2  | 73  |
| TB927.4.2110  | protein phosphatase 2C                                 | 29.4 protein.postranslational modification | 3  | 57  |
| TB927.7.2080  | methyltransferase                                      | 29.4 protein.postranslational modification | 2  | 56  |

|                |                                                       |                                             |    |     |
|----------------|-------------------------------------------------------|---------------------------------------------|----|-----|
| TB10.61.1880   | protein kinase                                        | 29.4 protein.postranslational modification  | 3  | 42  |
| TB927.8.5780   | protein tyrosine phosphatase                          | 29.4 protein.postranslational modification  | 1  | 41  |
| TB927.5.1660   | protein phosphatase 2C                                | 29.4 protein.postranslational modification  | 1  | 23  |
| TB927.5.3960   | arginine N-methyltransferase                          | 26.6 misc.O- methyl transferases            | 1  | 72  |
| TB927.8.7340   | trans-sialidase                                       | 29.5.11 protein.degradation                 | 2  | 38  |
| TB927.4.4650   | diphthine synthase                                    | 26.6 misc.O- methyl transferases            | 5  | 93  |
| TB11.01.2140   | glycosyl hydrolase-like protein                       | 26.3 misc.gluco-, galacto- and mannosidases | 1  | 37  |
| TB927.7.1300   | protein disulfide isomerase                           | 29.6 protein.(un)folding                    | 1  | 80  |
| TB09.211.1350  | peptidyl-prolyl cis-trans isomerase (cyclophilin- 40) | 29.6 protein.(un)folding                    | 2  | 60  |
| TB10.70.0280   | chaperonin Hsp60                                      | 29.6 protein.(un)folding                    | 13 | 109 |
| TB11.02.5450   | glucose-regulated protein 78                          | 29.6 protein.(un)folding                    | 8  | 114 |
| TB10.389.0880  | heat shock protein                                    | 29.6 protein.(un)folding                    | 25 | 104 |
| TB10.6K15.2330 | t-complex protein 1 subunit theta                     | 29.6 protein.(un)folding                    | 11 | 86  |
| TB11.01.4520   | prefoldin subunit 2                                   | 29.6 protein.(un)folding                    | 1  | 45  |
| TB10.6K15.2000 | chaperone protein DnaJ                                | 29.6 protein.(un)folding                    | 4  | 92  |
| TB11.01.3080   | heat shock protein 70                                 | 29.6 protein.(un)folding                    | 1  | 51  |
| TB11.01.3110   | heat shock protein 70                                 | 29.6 protein.(un)folding                    | 25 | 114 |
| TB927.7.5790   | protein disulfide isomerase                           | 29.6 protein.(un)folding                    | 3  | 53  |
| TB10.26.1080   | heat shock protein 83                                 | 29.6 protein.(un)folding                    | 17 | 103 |
| TB11.03.0250   | cyclophilin A                                         | 29.6 protein.(un)folding                    | 7  | 96  |
| TB09.211.2570  | t-complex protein 1 subunit eta                       | 29.6 protein.(un)folding                    | 2  | 75  |
| TB927.8.3150   | t-complex protein 1 gamma subunit                     | 29.6 protein.(un)folding                    | 3  | 82  |
| TB11.01.5860   | t-complex protein 1 subunit epsilon                   | 29.6 protein.(un)folding                    | 1  | 38  |
| TB927.7.2590   | prefoldin                                             | 29.6 protein.(un)folding                    | 2  | 68  |
| TB11.02.0250   | heat shock protein mitochondrial precursor            | 29.6 protein.(un)folding                    | 3  | 77  |
| TB927.6.3740   | heat shock 70 kDa protein                             | 29.6 protein.(un)folding                    | 23 | 121 |
| TB927.7.710    | heat shock 70 kDa protein                             | 29.6 protein.(un)folding                    | 11 | 97  |
| TB927.7.570    | prefoldin                                             | 29.6 protein.(un)folding                    | 7  | 71  |
| TB10.6K15.2290 | protein disulfide isomerase                           | 29.6 protein.(un)folding                    | 8  | 57  |
| TB11.02.2310   | prostaglandin f synthase                              | 30.99 signalling.unspecified                | 8  | 104 |
| TB09.160.4520  | calmodulin                                            | 30.3 signalling.calcium                     | 1  | 43  |
| TB11.01.4621   | calmodulin                                            | 30.3 signalling.calcium                     | 1  | 74  |
| TB927.8.5440   | flagellar calcium-binding protein TB-24               | 30.3 signalling.calcium                     | 1  | 54  |
| TB11.01.3170   | guanine nucleotide-binding protein subunit beta       | 30.5 signalling.G-proteins                  | 12 | 85  |
| TB11.01.1290   | 14-3-3-like protein                                   | 30.7 signalling.14-3-3 proteins             | 10 | 100 |

|                |                                                      |                                 |    |     |
|----------------|------------------------------------------------------|---------------------------------|----|-----|
| TB11.02.4700   | 14-3-3-like protein                                  | 30.7 signalling.14-3-3 proteins | 10 | 92  |
| TB09.160.3710  | proliferative cell nuclear antigen                   | 31.3 cell.cycle                 | 8  | 82  |
| TB927.8.6750   | translationally controlled tumor protein (TCTP)      | 31.3 cell.cycle                 | 4  | 93  |
| TB10.70.7040   | cell division protein kinase 2 homolog 1             | 31.3 cell.cycle                 | 1  | 67  |
| TB11.01.8520   | glucosamine-6-phosphate isomerase                    | 7.1.2 OPP.oxidative PP          | 9  | 88  |
| TB11.02.4200   | 6-phosphogluconolactonase                            | 7.1.2 OPP.oxidative PP          | 4  | 72  |
| TB927.8.5600   | transaldolase                                        | 7.2.2 OPP.non-reductive PP      | 14 | 78  |
| TB11.01.0700   | ribose 5-phosphate isomerase                         | 7.2.4 OPP.non-reductive PP      | 5  | 83  |
| TB11.02.3040   | aldo/keto reductase                                  | 3.5 minor CHO metabolism        | 1  | 43  |
| TB927.8.980    | phosphoacetylglucosamine mutase                      | 3 minor CHO metabolism          | 14 | 101 |
| TB11.03.0090   | ribokinase                                           | 3.5 minor CHO metabolism.others | 2  | 68  |
| TB10.61.2880   | aconitase                                            | 8.1.3 TCA / org. Transformation | 12 | 108 |
| TB927.3.2230   | succinyl-CoA synthetase alpha subunit                | 8.1.6 TCA / org. Transformation | 5  | 52  |
| TB11.02.0290   | succinyl-coA:3-ketoacid-coenzyme A transferase       | 8.1.6 TCA / org. Transformation | 3  | 51  |
| TB11.47.0004   | 2-oxoglutarate dehydrogenase subunit                 | 8.1.5 TCA / org. Transformation | 4  | 54  |
| TB10.6K15.3250 | succinyl-CoA ligase [GDP-forming] beta-chain         | 8.1.6 TCA / org. Transformation | 5  | 68  |
| TB11.01.1740   | 2-oxoglutarate dehydrogenase E1 component            | 8.1.5 TCA / org. Transformation | 9  | 87  |
| TB927.5.930    | NADH-dependent fumarate reductase                    | 8.1.7 TCA / org. Transformation | 4  | 74  |
| TB927.3.4500   | fumarate hydratase                                   | 8.1.8 TCA / org. Transformation | 28 | 107 |
| TB10.389.1530  | ribulose-5-phosphate 3-epimerase                     | 1.3.11 PS.calvin cyle.RPE       | 3  | 64  |
| TB11.01.3040   | cytosolic malate dehydrogenase                       | 6.3 gluconeogenesis             | 11 | 111 |
| TB10.70.5110   | mitochondrial malate dehydrogenase                   | 6.3 gluconeogenesis             | 2  | 73  |
| TB927.6.1570   | 2-hydroxy-3-oxopropionate reductase                  | 6 gluconeogenese                | 7  | 64  |
| TB11.02.3120   | malic enzyme                                         | 6.3 gluconeogenesis.            | 11 | 103 |
| TB10.61.0980   | glycosomal malate dehydrogenase                      | 6.3 gluconeogenesis             | 6  | 80  |
| TB927.2.4210   | glycosomal phosphoenolpyruvate carboxykinase         | 6.4 gluconeogenese              | 12 | 82  |
| TB10.6K15.3850 | glyceraldehyde 3-phosphate dehydrogenase cytosolic   | 4 glycolysis                    | 9  | 102 |
| TB10.6K15.2620 | phosphoglycerate mutase                              | 4.4.11 glycolysis               | 15 | 116 |
| TB10.70.1370   | fructose-bisphosphate aldolase glycosomal            | 4 glycolysis                    | 8  | 104 |
| TB11.02.3210   | triosephosphate isomerase                            | 4 glycolysis                    | 8  | 82  |
| TB11.02.4150   | pyruvate phosphate dikinase                          | 4 glycolysis                    | 10 | 108 |
| TB927.6.4280   | glyceraldehyde 3-phosphate dehydrogenase, glycosomal | 4 glycolysis                    | 18 | 61  |
| TB10.70.4740   | enolase                                              | 4.12 glycolysis                 | 22 | 129 |
| TB927.1.3830   | glucose-6-phosphate isomerase, glycosomal            | 4 glycolysis                    | 1  | 73  |
| TB927.3.1790   | pyruvate dehydrogenase E1 beta subunit               | 4 glycolysis                    | 2  | 64  |

|               |                                                  |                                 |    |     |
|---------------|--------------------------------------------------|---------------------------------|----|-----|
| TB927.1.710   | phosphoglycerate kinase                          | 4 glycolysis                    | 8  | 91  |
| TB10.70.5200  | glucose-6-phosphate 1-dehydrogenase              | 4 glycolysis                    | 1  | 39  |
| TB10.70.0370  | phosphomannomutase                               | 3 CHO metabolism                | 7  | 78  |
| TB11.01.6410  | phosphomannose isomerase                         | 3 CHO metabolism                | 1  | 60  |
| TB927.1.2340  | alpha tubulin                                    | 31.1 cell.organisation          | 18 | 133 |
| TB09.211.0740 | p21 antigen protein                              | 31.6* cell organization         | 1  | 56  |
| TB11.01.5100  | paraflagellar rod component                      | 31.1 cell.organisation          | 6  | 90  |
| TB09.211.4511 | kinetoplastid membrane protein KMP-11            | 31.1 cell.organisation          | 4  | 46  |
| TB927.3.4290  | 73 kDa paraflagellar rod protein                 | 31.1 cell.organisation          | 12 | 73  |
| TB927.8.4970  | 69 kDa paraflagellar rod protein                 | 31.1 cell.organisation          | 23 | 92  |
| TB10.406.0560 | microtubule-associated protein                   | 31.1 cell.organisation          | 4  | 56  |
| TB927.3.5180  | cofilin/actin depolymerizing factor              | 31.1 cell.organisation          | 3  | 71  |
| TB927.7.3440  | I/6 autoantigen                                  | 31.1 cell.organisation          | 2  | 61  |
| TB927.4.3950  | cytoskeleton-associated protein CAP5.5           | 31.1 cell.organisation          | 11 | 86  |
| TB927.4.2070  | antigenic protein                                | 31.6* cell organization         | 4  | 77  |
| TB927.8.6200  | tubulin folding cofactor D                       | 31.1 cell.organisation          | 8  | 64  |
| TB927.1.2330  | beta tubulin                                     | 31.1 cell.organisation          | 15 | 91  |
| TB11.01.5350  | profilin                                         | 31.1 cell.organisation          | 2  | 79  |
| TB10.406.0650 | microtubule-associated protein                   | 31.1 cell.organisation          | 3  | 75  |
| TB11.02.3390  | dynein light chain                               | 31.1 cell.organisation          | 2  | 65  |
| TB09.211.0620 | actin A                                          | 31.1 cell.organisation          | 2  | 50  |
| TB927.7.3160  | dynein heavy chain, cytosolic                    | 31.1 cell.organisation          | 1  | 29  |
| TB09.160.1200 | mitotubule-associated protein Gb4                | 31.1 cell.organisation          | 1  | 29  |
| TB11.02.1120  | adenylosuccinate synthetase                      | 23.1.2 nucleotide metabolism    | 20 | 89  |
| TB927.3.3450  | ADP-ribosylation factor-like protein 3A          | 23 nucleotide metabolism        | 7  | 75  |
| TB927.7.2100  | GMP synthase                                     | 23.1.2.31 nucleotide metabolism | 13 | 90  |
| TB927.8.2050  | mannose-1-phosphate guanyltransferase            | 23 nucleotide metabolism        | 2  | 87  |
| TB11.V4.0004  | ribonucleoside-diphosphate reductase small chain | 23 nucleotide metabolism        | 6  | 66  |
| TB09.211.4460 | ADP-ribosylation factor                          | 23 nucleotide metabolism        | 5  | 81  |
| TB927.7.7530  | receptor-type adenylate cyclase GRESAG 4         | 23 nucleotide metabolism        | 1  | 26  |
| TB927.7.1780  | adenine phosphoribosyltransferase                | 23 nucleotide metabolism        | 4  | 81  |
| TB927.7.4570  | nucleoside hydrolase                             | 23 nucleotide metabolism        | 10 | 79  |
| TB927.7.5160  | deoxyuridine triphosphatase                      | 23 nucleotide metabolism        | 6  | 91  |
| TB927.3.2960  | inosine-adenosine-guanosine-nucleoside hydrolase | 23 nucleotide metabolism        | 5  | 81  |
| TB927.2.5660  | adenylate kinase                                 | 23.1.2 nucleotide metabolism    | 4  | 56  |

|               |                                                       |                                                    |    |    |
|---------------|-------------------------------------------------------|----------------------------------------------------|----|----|
| TB11.02.4140  | inositol-1,4,5-trisphosphate 5-phosphatase            | 23.1.2 nucleotide metabolism                       | 1  | 54 |
| TB10.70.7330  | adenylate kinase                                      | 23.1.2 nucleotide metabolism                       | 2  | 58 |
| TB927.4.3320  | uracil phosphoribosyltransferase                      | 23.3.1.3 nucleotide metabolism                     | 5  | 49 |
| TB10.70.6540  | hypoxanthine-guanine phosphoribosyltransferase        | 23.1.2 nucleotide metabolism                       | 1  | 46 |
| TB11.01.7800  | nucleoside diphosphate kinase                         | 23 nucleotide metabolism                           | 9  | 92 |
| TB927.7.4480  | adenosine 5'-monophosphoramidase                      | 23 nucleotide metabolism                           | 5  | 66 |
| TB09.160.4250 | tryparedoxin peroxidase                               | 21.5 redox.peroxiredoxins                          | 9  | 67 |
| TB10.406.0520 | trypanothione reductase                               | 21.2 redox.ascorbate and glutathione               | 11 | 82 |
| TB927.3.3760  | tryparedoxin                                          | 21.5 redox.peroxiredoxins                          | 5  | 61 |
| TB927.7.1120  | trypanothione/tryparedoxin dependent peroxidase 1     | 21.5 redox.peroxiredoxins                          | 1  | 50 |
| TB927.7.1140  | trypanothione/tryparedoxin dependent peroxidase 3     | 21.5 redox.peroxiredoxins                          | 1  | 25 |
| TB927.7.1130  | trypanothione/tryparedoxin dependent peroxidase 2     | 21.5 redox.peroxiredoxins                          | 5  | 60 |
| TB927.2.4370  | trypanothione synthetase                              | 21.2.2 redox.ascorbate and glutathione.glutathione | 11 | 86 |
| TB11.47.0012  | glutaredoxin                                          | 21.4 redox.glutaredoxins                           | 2  | 42 |
| TB11.02.0490  | RNA editing complex protein MP46                      | 27.1 RNA.processing                                | 1  | 28 |
| TB09.211.2150 | poly(A)-binding protein 1                             | 27.3 RNA.regulation of transcription               | 5  | 61 |
| TB927.2.5850  | small nuclear ribonucleoprotein                       | 27.1 RNA.processing                                | 2  | 75 |
| TB927.8.740   | nucleolar RNA-binding protein, truncated              | 27.4 RNA.RNA binding                               | 1  | 24 |
| TB10.70.5360  | La protein                                            | 27.4 RNA.RNA binding                               | 8  | 87 |
| TB11.55.0009  | mitochondrial RNA-binding protein 1                   | 27.4 RNA.RNA binding                               | 1  | 42 |
| TB927.8.6440  | RNA-binding protein                                   | 27.4 RNA.RNA binding                               | 1  | 24 |
| TB10.61.2130  | ATP-dependent DEAD/H RNA helicase                     | 27.5* RNA.DEAD/DEAH BOX helicase                   | 5  | 85 |
| TB927.3.2600  | ATP-dependent DEAD/H RNA helicase, putative           | 27.5* RNA.DEAD/DEAH BOX helicase                   | 31 | 90 |
| TB10.70.3290  | ATP-dependent DEAD-box RNA helicase                   | 27.5* RNA.DEAD/DEAH BOX helicase                   | 5  | 93 |
| TB927.7.4900  | 5'-3' exonuclease XRNA                                | 28.1 DNA.synthesis/chromatin structure             | 1  | 24 |
| TB10.70.0800  | universal minicircle sequence binding protein (UMSBP) | 28.1 DNA.synthesis/chromatin structure             | 3  | 85 |
| TB10.406.0330 | histone H2B                                           | 28.1 DNA.synthesis/chromatin structure             | 4  | 83 |
| TB11.01.0870  | replication factor A 51kDa subunit                    | 28.1 DNA.synthesis/chromatin structure             | 1  | 48 |
| TB927.7.2820  | histone H2A                                           | 28.1 DNA.synthesis/chromatin structure             | 2  | 67 |
| TB927.5.4170  | histone H4                                            | 28.1 DNA.synthesis/chromatin structure             | 2  | 99 |
| TB927.7.7040  | methylthioadenosine phosphorylase, putative           | 28.1 DNA.synthesis/chromatin structure             | 5  | 47 |
| TB927.2.2670  | histone H4                                            | 28.1 DNA.synthesis/chromatin structure             | 1  | 25 |
| TB927.5.1700  | replication Factor A 28 kDa subunit, putative         | 28.1 DNA.synthesis/chromatin structure             | 1  | 52 |
| TB09.160.4090 | DNA topoisomerase II                                  | 28.1 DNA.synthesis/chromatin structure             | 1  | 28 |
| TB09.160.1240 | hypothetical protein                                  | 35.1 not assigned.no ontology                      | 1  | 55 |



|                |                                      |                               |    |     |
|----------------|--------------------------------------|-------------------------------|----|-----|
| TB927.5.1460   | hypothetical protein                 | 35.1 not assigned.no ontology | 6  | 70  |
| TB09.211.0900  | hypothetical protein                 | 35.1 not assigned.no ontology | 1  | 61  |
| TB10.406.0280  | hypothetical protein                 | 35.1 not assigned.no ontology | 3  | 73  |
| TB927.5.2930   | hypothetical protein                 | 35.1 not assigned.no ontology | 6  | 64  |
| TB11.01.7010   | hypothetical protein                 | 35.1 not assigned.no ontology | 23 | 114 |
| TB927.4.2030   | hypothetical protein                 | 35.1 not assigned.no ontology | 3  | 74  |
| TB927.2.340    | retrotransposon hot spot (RHS)       | 35.1 not assigned.no ontology | 7  | 67  |
| TB927.7.6090   | hypothetical protein                 | 35.1 not assigned.no ontology | 2  | 74  |
| TB10.70.2770   | stress-inducible protein STI1-like   | 35.2 not assigned.unknown     | 8  | 86  |
| TB927.5.2940   | stress-induced protein sti1          | 35.2 not assigned.unknown     | 8  | 79  |
| TB927.2.470    | retrotransposon hot spot (RHS)       | 35.1 not assigned.no ontology | 4  | 88  |
| TB11.42.0004   | hypothetical protein                 | 35.1 not assigned.no ontology | 3  | 67  |
| TB927.4.3740   | hypothetical protein                 | 35.1 not assigned.no ontology | 6  | 93  |
| TB09.160.4480  | hypothetical protein                 | 35.1 not assigned.no ontology | 1  | 29  |
| TB927.3.2100   | hypothetical protein                 | 35.1 not assigned.no ontology | 11 | 81  |
| TB927.6.2200   | hypothetical protein                 | 35.1 not assigned.no ontology | 4  | 85  |
| TB11.01.0120   | haloacid dehalogenase-like hydrolase | 35.1 not assigned.no ontology | 2  | 63  |
| TB10.6K15.1900 | hypothetical protein                 | 35.1 not assigned.no ontology | 7  | 89  |
| TB927.4.4660   | hypothetical protein                 | 35.1 not assigned.no ontology | 6  | 75  |
| TB927.5.1280   | hypothetical protein                 | 35.1 not assigned.no ontology | 5  | 93  |
| TB11.01.5780   | hypothetical protein                 | 35.1 not assigned.no ontology | 3  | 63  |
| TB09.211.0560  | hypothetical protein                 | 35.1 not assigned.no ontology | 5  | 66  |
| TB927.4.360    | hypothetical protein                 | 35.1 not assigned.no ontology | 3  | 91  |
| TB927.8.3790   | hypothetical protein                 | 35.1 not assigned.no ontology | 1  | 60  |
| TB10.70.4930   | hypothetical protein                 | 35.1 not assigned.no ontology | 7  | 67  |
| TB927.1.220    | retrotransposon hot spot (RHS)       | 35.1 not assigned.no ontology | 6  | 57  |
| TB09.211.3140  | hypothetical protein                 | 35.1 not assigned.no ontology | 1  | 54  |
| TB927.6.2280   | hypothetical protein                 | 35.1 not assigned.no ontology | 4  | 55  |
| TB927.2.280    | retrotransposon hot spot (RHS)       | 35.1 not assigned.no ontology | 4  | 59  |
| TB11.01.5680   | hypothetical protein                 | 35.1 not assigned.no ontology | 3  | 70  |
| TB927.5.1360   | hypothetical protein                 | 35.1 not assigned.no ontology | 4  | 50  |
| TB09.160.1160  | hypothetical protein                 | 35.1 not assigned.no ontology | 4  | 76  |
| TB11.01.5570   | hypothetical protein                 | 35.1 not assigned.no ontology | 2  | 72  |
| TB10.61.0540   | hypothetical protein                 | 35.1 not assigned.no ontology | 4  | 72  |
| TB09.160.5100  | hypothetical protein                 | 35.1 not assigned.no ontology | 10 | 68  |

|               |                                        |                               |    |     |
|---------------|----------------------------------------|-------------------------------|----|-----|
| TB927.3.4040  | hypothetical protein                   | 35.1 not assigned.no ontology | 5  | 80  |
| TB927.7.5950  | hypothetical protein                   | 35.1 not assigned.no ontology | 1  | 50  |
| TB927.6.4140  | hypothetical protein                   | 35.1 not assigned.no ontology | 1  | 56  |
| TB09.211.4360 | hypothetical protein                   | 35.1 not assigned.no ontology | 4  | 75  |
| TB09.160.4460 | hypothetical protein                   | 35.1 not assigned.no ontology | 9  | 50  |
| TB09.160.2350 | hypothetical protein                   | 35.1 not assigned.no ontology | 2  | 78  |
| TB927.3.4880  | hypothetical protein                   | 35.1 not assigned.no ontology | 3  | 47  |
| TB11.02.0870  | hypothetical protein                   | 35.1 not assigned.no ontology | 7  | 63  |
| TB927.5.2160  | hypothetical protein                   | 35.1 not assigned.no ontology | 3  | 97  |
| TB927.7.2980  | hypothetical protein                   | 35.1 not assigned.no ontology | 3  | 65  |
| TB10.26.0960  | hypothetical protein                   | 35.1 not assigned.no ontology | 2  | 66  |
| TB11.01.8770  | hypothetical protein                   | 35.1 not assigned.no ontology | 12 | 88  |
| TB11.02.4250  | hypothetical protein                   | 35.1 not assigned.no ontology | 3  | 75  |
| TB11.01.6740  | hypothetical protein                   | 35.1 not assigned.no ontology | 3  | 60  |
| TB927.8.6660  | hypothetical protein                   | 35.1 not assigned.no ontology | 2  | 41  |
| TB927.4.1300  | hypothetical protein                   | 35.1 not assigned.no ontology | 11 | 73  |
| TB11.02.1690  | hypothetical protein                   | 35.1 not assigned.no ontology | 9  | 112 |
| TB927.6.4770  | hypothetical protein                   | 35.1 not assigned.no ontology | 5  | 75  |
| TB11.01.4740  | hypothetical protein                   | 35.1 not assigned.no ontology | 2  | 86  |
| TB927.4.2740  | hypothetical protein                   | 35.1 not assigned.no ontology | 5  | 61  |
| TB11.02.2030  | hypothetical protein                   | 35.1 not assigned.no ontology | 4  | 85  |
| TB927.3.5310  | hypothetical protein                   | 35.1 not assigned.no ontology | 4  | 54  |
| TB927.2.450   | retrotransposon hot spot (RHS) protein | 35.1 not assigned.no ontology | 14 | 77  |
| TB09.211.3300 | hypothetical protein                   | 35.1 not assigned.no ontology | 2  | 56  |
| TB927.2.240   | retrotransposon hot spot (RHS) protein | 35.1 not assigned.no ontology | 2  | 46  |
| TB927.1.420   | retrotransposon hot spot (RHS) protein | 35.1 not assigned.no ontology | 1  | 26  |
| TB927.7.4520  | hypothetical protein                   | 35.1 not assigned.no ontology | 7  | 81  |
| TB09.211.1620 | hypothetical protein                   | 35.1 not assigned.no ontology | 20 | 65  |
| TB927.1.1670  | hypothetical protein                   | 35.1 not assigned.no ontology | 3  | 57  |
| TB927.2.1170  | retrotransposon hot spot (RHS) protein | 35.1 not assigned.no ontology | 5  | 73  |
| TB11.01.5440  | hypothetical protein                   | 35.1 not assigned.no ontology | 1  | 69  |
| TB927.2.5150  | hypothetical protein                   | 35.1 not assigned.no ontology | 1  | 21  |
| TB927.3.1010  | hypothetical protein                   | 35.1 not assigned.no ontology | 2  | 73  |
| TB10.70.6610  | hypothetical protein                   | 35.1 not assigned.no ontology | 2  | 74  |
| TB11.47.0011  | hypothetical protein                   | 35.1 not assigned.no ontology | 1  | 34  |

|                |                                        |                               |   |     |
|----------------|----------------------------------------|-------------------------------|---|-----|
| TB10.70.0860   | hypothetical protein                   | 35.1 not assigned.no ontology | 1 | 29  |
| TB10.70.1130   | hypothetical protein                   | 35.1 not assigned.no ontology | 2 | 104 |
| TB927.5.440    | hypothetical protein                   | 35.1 not assigned.no ontology | 1 | 53  |
| TB11.01.8610   | hypothetical protein                   | 35.1 not assigned.no ontology | 1 | 27  |
| TB927.5.2260   | hypothetical protein                   | 35.1 not assigned.no ontology | 2 | 48  |
| TB927.6.1530   | hypothetical protein                   | 35.1 not assigned.no ontology | 3 | 46  |
| TB11.02.4760   | hypothetical protein                   | 35.1 not assigned.no ontology | 1 | 23  |
| TB927.3.3510   | hypothetical protein                   | 35.1 not assigned.no ontology | 1 | 23  |
| TB927.7.4290   | hypothetical protein                   | 35.1 not assigned.no ontology | 3 | 53  |
| TB10.6K15.1910 | hypothetical protein                   | 35.1 not assigned.no ontology | 1 | 27  |
| TB09.211.1050  | hypothetical protein                   | 35.1 not assigned.no ontology | 1 | 22  |
| TB10.26.0385   | hypothetical protein                   | 35.1 not assigned.no ontology | 1 | 49  |
| TB09.211.1950  | hypothetical protein                   | 35.1 not assigned.no ontology | 1 | 75  |
| TB09.160.0465  | hypothetical protein                   | 35.1 not assigned.no ontology | 1 | 44  |
| TB927.4.1890   | hypothetical protein                   | 35.1 not assigned.no ontology | 3 | 67  |
| TB927.7.4270   | hypothetical protein                   | 35.1 not assigned.no ontology | 2 | 47  |
| TB10.6K15.3240 | hypothetical protein                   | 35.1 not assigned.no ontology | 1 | 65  |
| TB11.02.3760   | hypothetical protein                   | 35.1 not assigned.no ontology | 1 | 55  |
| TB11.02.0660   | hypothetical protein                   | 35.1 not assigned.no ontology | 1 | 36  |
| TB927.2.1180   | retrotransposon hot spot (RHS) protein | 35.1 not assigned.no ontology | 1 | 25  |
| TB927.6.2120   | hypothetical protein                   | 35.1 not assigned.no ontology | 1 | 22  |
| TB927.6.1950   | hypothetical protein                   | 35.1 not assigned.no ontology | 2 | 70  |
| TB11.01.2790   | hypothetical protein                   | 35.1 not assigned.no ontology | 1 | 22  |
| TB927.8.2080   | hypothetical protein                   | 35.1 not assigned.no ontology | 1 | 73  |
| TB927.2.100    | retrotransposon hot spot (RHS) protein | 35.1 not assigned.no ontology | 3 | 49  |
| TB11.01.4880   | hypothetical protein                   | 35.1 not assigned.no ontology | 1 | 52  |
| TB927.2.2770   | hypothetical protein                   | 35.1 not assigned.no ontology | 1 | 51  |
| TB10.61.3130   | hypothetical protein                   | 35.1 not assigned.no ontology | 2 | 65  |
| TB11.02.0210   | hypothetical protein                   | 35.1 not assigned.no ontology | 2 | 60  |
| TB927.6.3840   | reticulon domain protein               | 31.99 cell.unspecified        | 1 | 52  |
| TB927.5.3030   | hypothetical protein                   | 35.1 not assigned.no ontology | 1 | 22  |
| TB927.7.3550   | hypothetical protein                   | 35.1 not assigned.no ontology | 1 | 24  |
| TB927.3.3000   | hypothetical protein                   | 35.1 not assigned.no ontology | 1 | 30  |
| TB11.02.2040   | hypothetical protein                   | 35.1 not assigned.no ontology | 3 | 50  |
| TB10.70.5050   | hypothetical protein                   | 35.1 not assigned.no ontology | 2 | 96  |

|               |                                    |                               |   |    |
|---------------|------------------------------------|-------------------------------|---|----|
| TB927.2.4580  | hypothetical protein               | 35.1 not assigned.no ontology | 2 | 49 |
| TB927.3.4940  | hypothetical protein               | 35.1 not assigned.no ontology | 2 | 57 |
| TB11.01.8590  | hypothetical protein               | 35.1 not assigned.no ontology | 1 | 85 |
| TB927.8.1170  | hypothetical protein               | 35.1 not assigned.no ontology | 1 | 32 |
| TB11.01.8030  | hypothetical protein               | 35.1 not assigned.no ontology | 1 | 67 |
| TB927.7.4500  | hypothetical protein               | 35.1 not assigned.no ontology | 1 | 43 |
| TB09.211.1690 | hypothetical protein               | 35.1 not assigned.no ontology | 1 | 75 |
| TB10.389.1370 | hypothetical protein               | 35.1 not assigned.no ontology | 1 | 34 |
| TB927.8.5890  | hypothetical protein               | 35.1 not assigned.no ontology | 3 | 27 |
| TB927.4.380   | hypothetical protein               | 35.1 not assigned.no ontology | 1 | 34 |
| TB10.61.3210  | hypothetical protein               | 35.1 not assigned.no ontology | 2 | 92 |
| TB927.7.1010  | hypothetical protein               | 35.1 not assigned.no ontology | 1 | 24 |
| TB11.02.5000  | NGG1 interacting factor 3-like     | 35.1 not assigned.no ontology | 1 | 37 |
| TB927.6.5370  | variant surface glycoprotein (VSG) | 31.99 cell.unspecified        | 1 | 28 |
| TB09.142.0230 | variant surface glycoprotein       | 31.99 cell.unspecified        | 1 | 25 |
| TB927.5.2700  | otubain                            | 35.2 not assigned.unknown     | 1 | 39 |

**SHEET 3**

**Comparison between secretome  
of two procyclic strains  
(Biyamina and Stib 215)**

| Specific to procyclic Biyamina |                                  | Specific to procyclic Stib 215 |                               | common to Biyamina and Stib 215 |                                                |
|--------------------------------|----------------------------------|--------------------------------|-------------------------------|---------------------------------|------------------------------------------------|
| accession number               | protein names                    | accession number               | protein names                 | accession number                | protein names                                  |
| TB09.211.0350                  | adenylate kinase                 | TB927.7.1120                   | peroxidase 1, cytosolic       | TB927.6.3740                    | heat shock 70 kDa protein                      |
| TB927.8.4430                   | nucleoside phosphorylase         | TB09.160.1160                  | hypothetical protein          | TB927.8.980                     | phosphoacetylglucosamine mutase                |
| TB11.01.3020                   | 40S ribosomal protein L14        | TB927.1.4830                   | phospholipase A1              | TB09.160.4560                   | arginine kinase                                |
| TB11.01.2530                   | kinesin-like protein             | TB09.160.1240                  | hypothetical protein          | TB927.8.6390                    | lysophospholipase                              |
| TB10.6K15.1160                 | G-actin binding protein          | TB09.160.5580                  | 60S ribosomal protein L11     | TB927.7.710                     | heat shock 70 kDa protein                      |
| TB927.8.1330                   | 60S ribosomal protein L7a        | TB09.211.2570                  | t-complex protein 1           | TB09.211.0120                   | nascent polypeptide associated complex subunit |
| TB927.6.2360                   | adenosine kinase                 | TB10.389.1180                  | P-type H <sup>+</sup> -ATPase | TB927.6.2740                    | pyridoxal kinase                               |
| TB11.01.4860                   | guide RNA-binding protein        | TB927.8.8330                   | calpain                       | TB927.3.3900                    | carnitine O-palmitoyltransferase II            |
| TB927.7.5210                   | hypothetical protein             | TB927.6.1520                   | aquaporin 3                   | TB927.3.1380                    | ATP synthase beta chain                        |
| TB11.01.7740                   | hypothetical protein             | TB927.4.4650                   | diphthine synthase            | TB11.01.5440                    | hypothetical protein                           |
| TB11.02.2840                   | hypothetical protein             | TB927.2.5150                   | hypothetical protein          | TB927.6.4480                    | valyl-tRNA synthetase                          |
| TB927.7.2650                   | hypothetical protein             | TB10.70.4720                   | importin subunit beta-1       | TB11.02.4700                    | hypothetical protein                           |
| TB10.70.7090                   | serine carboxypeptidase          | TB11.02.4000                   | 40S ribosomal protein S15a    | TB10.61.0980                    | glycosomal malate dehydrogenase                |
| TB09.211.2360                  | protein kinase A                 | TB10.70.7040                   | cell division protein kinase  | TB927.7.1040                    | 40S ribosomal protein S16                      |
| TB927.1.180                    | retrotransposon hot spot protein | TB11.02.5000                   | interacting factor 3-like     | TB10.70.7695                    | 40S ribosomal protein S11                      |
| TB927.2.4610                   | amino acid aminotransferase      | TB927.5.4170                   | histone H4                    | TB927.3.4500                    | fumarate hydratase                             |
| TB927.4.4070                   | mevalonate kinase                | TB10.61.1880                   | protein kinase                | TB11.46.0001                    | 60S acidic ribosomal subunit protein           |
| TB927.5.1160                   | hypothetical protein             | TB927.8.3150                   | t-complex protein 1           | TB10.6K15.2050                  | 40S ribosomal protein S12                      |
| TB927.3.3310                   | 60S ribosomal protein L13        | TB10.70.6610                   | hypothetical protein          | TB10.70.6620                    | methionine aminopeptidase 2                    |
| TB927.5.3580                   | phosphoglycerate mutase          | TB09.160.5550                  | calpain                       | TB927.1.2340                    | alpha tubulin                                  |
| TB927.2.510                    | retrotransposon hot spot protein | TB11.47.0011                   | hypothetical protein          | TB11.01.7800                    | nucleoside diphosphate kinase                  |
| TB10.70.1380                   | 40S ribosomal protein S9         | TB927.7.5950                   | hypothetical protein          | TB927.2.5060                    | GTP binding protein                            |
| TB927.7.280                    | cyclophilin                      | TB11.47.0004                   | 2-oxoglutarate dehydrogenase  | TB10.389.1530                   | ribulose-5-phosphate 3-epimerase               |

|                |                                  |                |                                 |                |                                              |
|----------------|----------------------------------|----------------|---------------------------------|----------------|----------------------------------------------|
| TB10.389.1260  | hypothetical protein             | TB927.7.7530   | GRESAG 4                        | TB927.7.4790   | proteasome beta 6 subunit                    |
| TB927.7.3170   | hypothetical protein             | TB927.8.6440   | RNA-binding protein             | TB10.6K15.2290 | protein disulfide isomerase                  |
| TB11.02.0690   | hypothetical protein             | TB10.70.0860   | hypothetical protein            | TB11.02.3390   | dynein light chain                           |
| TB927.5.700    | hypothetical protein             | TB927.7.4900   | 5'-3' exonuclease XRNA          | TB11.47.0012   | glutaredoxin                                 |
| TB927.8.4780   | hypothetical protein             | TB09.211.0900  | hypothetical protein            | TB927.7.7040   | methylthioadenosine phosphorylase            |
| TB11.02.2520   | hypothetical protein             | TB927.5.440    | hypothetical protein            | TB927.6.4590   | glutamyl-tRNA synthetase                     |
| TB09.142.0100  | variant surface glycoprotein     | TB10.406.0280  | hypothetical protein            | TB927.5.1460   | hypothetical protein                         |
| TB927.8.5120   | cytochrome c                     | TB09.160.1950  | exopolyphosphatase              | TB927.7.570    | prefoldin                                    |
| TB10.26.0200   | guanylate kinase                 | TB927.5.2930   | hypothetical protein            | TB927.2.4210   | glycosomal phosphoenolpyruvate carboxykinase |
| TB09.211.2540  | calmodulin-like protein          | TB927.8.1860   | pitrylisin-like metalloprotease | TB927.7.190    | thimet oligopeptidase A, putative            |
| TB927.2.2130   | rab6 small GTP-binding protein   | TB927.5.3210   | small ubiquitin protein         | TB10.70.1130   | hypothetical protein                         |
| TB927.7.1730   | 60S ribosomal protein L7         | TB11.01.2140   | glycosyl hydrolase-like protein | TB09.160.4520  | calmodulin                                   |
| TB11.01.3550   | 2-oxoglutarate dehydrogenase     | TB927.6.4140   | hypothetical protein            | TB11.55.0009   | mitochondrial RNA-binding protein 1          |
| TB11.02.4170   | 40S ribosomal protein S5         | TB09.160.0810  | kynureninase                    | TB09.211.0620  | actin A                                      |
| TB10.6K15.0080 | hypothetical protein             | TB09.211.4360  | hypothetical protein            | TB11.02.1085   | 40s ribosomal protein S4                     |
| TB11.01.3805   | microtubule-associated protein   | TB09.211.4330  | aminopeptidase P                | TB09.211.3550  | glycerol kinase glycosomal                   |
| TB927.1.3170   | hypothetical protein             | TB09.160.4460  | hypothetical protein            | TB11.52.0003   | oligopeptidase b                             |
| TB927.3.5550   | small GTP-binding protein        | TB927.6.5370   | variant surface glycoprotein    | TB11.01.3040   | cytosolic malate dehydrogenase               |
| TB927.5.1710   | ribonucleoprotein p18            | TB927.6.1530   | hypothetical protein            | TB11.01.1350   | S-adenosylhomocysteine hydrolase             |
| TB11.01.8200   | enoyl-CoA hydratase              | TB11.02.4760   | hypothetical protein            | TB927.5.2260   | hypothetical protein                         |
| TB10.6K15.0290 | hypothetical protein             | TB09.160.2350  | hypothetical protein            | TB09.211.0740  | p21 antigen protein                          |
| TB927.3.3610   | targeting signal type 2 receptor | TB11.01.7010   | hypothetical protein            | TB10.70.2650   | elongation factor 2                          |
| TB927.4.5010   | calreticulin                     | TB927.3.3510   | hypothetical protein            | TB927.3.2090   | aminopeptidase P1                            |
| TB11.01.8390   | hypothetical protein             | TB927.7.4290   | hypothetical protein            | TB927.6.4980   | 40S ribosomal protein S14                    |
| TB927.7.3330   | hypothetical protein             | TB927.4.1080   | V-type ATPase, A subunit        | TB927.7.4070   | calpain-like cysteine peptidase              |
| TB10.6K15.3160 | fibrillarin                      | TB10.6K15.1910 | hypothetical protein            | TB927.4.2030   | hypothetical protein                         |
| TB10.389.1730  | protein kinase                   | TB09.211.3610  | ubiquitin-activating enzyme E1  | TB927.2.340    | retrotransposon hot spot (RHS) protein       |
| TB927.6.950    | cysteinyl-tRNA synthetase        | TB927.8.7340   | trans-sialidase                 | TB10.70.2770   | stress-inducible protein STI1-like           |
| TB10.61.2550   | N-myristoyl transferase          | TB927.5.2700   | otubain                         | TB927.5.2940   | stress-induced protein sti1                  |
| TB11.01.7550   | iron superoxide dismutase        | TB927.7.6090   | hypothetical protein            | TB11.01.2560   | 40S ribosomal protein SA                     |
| TB927.5.950    | thioredoxin-like protein         | TB09.211.1050  | hypothetical protein            | TB09.160.3270  | eukaryotic initiation factor 4a              |
| TB09.211.3180  | 6-phosphogluconate dehydrogenase | TB10.26.0385   | hypothetical protein            | TB09.211.1950  | hypothetical protein                         |
| TB11.03.0335   | hypothetical protein             | TB927.3.4840   | ubiquitin hydrolase             | TB927.2.470    | retrotransposon hot spot protein             |
| TB11.47.0016   | hypothetical protein             | TB927.8.5210   | cullin                          | TB927.8.3530   | glycerol-3-phosphate dehydrogenase           |
| TB927.3.5340   | Hsc70-interacting protein (Hip)  | TB11.42.0004   | hypothetical protein            | TB927.6.1080   | hydroxyacylglutathione hydrolase             |

|                |                                      |                |                                   |                |                                               |
|----------------|--------------------------------------|----------------|-----------------------------------|----------------|-----------------------------------------------|
| TB11.01.7120   | hypothetical protein                 | TB927.4.1890   | hypothetical protein              | TB927.4.3740   | hypothetical protein                          |
| TB10.6K15.0410 | 60S ribosomal protein L18            | TB927.4.3620   | serine/threonine-phosphatase      | TB09.160.4480  | hypothetical protein                          |
| TB11.01.8510   | t-complex protein 1 subunit alpha    | TB11.02.5380   | exosome complex exonuclease       | TB09.211.2590  | proteasome subunit beta 2                     |
| TB11.01.2000   | HslVU complex proteolytic subunit    | TB927.2.2670   | histone H4                        | TB09.211.4550  | 60S ribosomal protein L12                     |
| TB927.8.1610   | major surface protease gp63          | TB11.01.5100   | paraflagellar rod component       | TB11.01.6410   | phosphomannose isomerase                      |
| TB11.02.3330   | hypothetical protein                 | TB927.7.4270   | hypothetical protein              | TB927.3.2100   | hypothetical protein                          |
| TB11.01.5590   | hypothetical protein                 | TB927.6.700    | alanyl-tRNA synthetase            | TB11.01.8520   | glucosamine-6-phosphate isomerase             |
| TB10.389.1890  | hypothetical protein                 | TB09.142.0230  | variant surface glycoprotein      | TB11.03.0090   | ribokinase                                    |
| TB10.61.0620   | hypothetical protein                 | TB11.01.4520   | prefoldin subunit 2               | TB927.5.1660   | protein phosphatase 2C                        |
| TB927.4.5340   | hypothetical protein                 | TB10.6K15.3240 | hypothetical protein              | TB09.160.4250  | tryparedoxin peroxidase                       |
| TB927.1.3200   | phosphatase-like protein             | TB11.02.4140   | inositol-1,4,5-trip 5-phosphatase | TB927.7.1110   | asparagine synthetase a                       |
| TB927.4.430    | proteasome beta 7 subunit            | TB10.6K15.2000 | chaperone protein DnaJ            | TB927.6.2200   | hypothetical protein                          |
| TB10.70.7020   | 40S ribosomal protein S23            | TB927.8.5780   | protein tyrosine phosphatase      | TB927.6.2790   | L-threonine 3-dehydrogenase                   |
| TB927.4.890    | small nuclear ribonucleoprotein      | TB10.70.7330   | adenylate kinase                  | TB11.02.0660   | hypothetical protein                          |
| TB09.211.3540  | glycerol kinase glycosomal           | TB11.02.3760   | hypothetical protein              | TB11.02.1120   | adenylosuccinate synthetase                   |
| TB927.6.1030   | cysteine peptidase precursor         | TB927.8.1600   | lysyl-tRNA synthetase             | TB11.02.5400   | cystathionine beta-synthase                   |
| TB927.5.1470   | NADH-cytochrome b5 reductase         | TB11.02.3040   | aldo/keto reductase               | TB10.6K15.1900 | hypothetical protein                          |
| TB10.70.0790   | proteasome subunit beta 5            | TB10.6K15.2840 | protein transport protein Sec23A  | TB927.7.1300   | protein disulfide isomerase                   |
| TB09.160.4620  | inositol-1(or 4)-monophosphatase     | TB10.61.2130   | DEAD/H RNA helicase               | TB10.70.4280   | delta-1-pyrroline-5-carboxylate dehydrogenase |
| TB927.1.700    | phosphoglycerate kinase              | TB11.01.0120   | hydrolase                         | TB927.4.3570   | translation elongation factor 1-beta          |
| TB11.03.0390   | protein phosphatase 2C               | TB927.2.1180   | retrotransposon hot spot protein  | TB09.160.4590  | arginine kinase                               |
| TB927.7.4770   | cyclophilin                          | TB11.01.1400   | glycyl-tRNA synthetase            | TB927.4.4660   | hypothetical protein                          |
| TB10.05.0010   | diphosphomevalonate decarboxylase    | TB927.6.2120   | hypothetical protein              | TB11.01.8740   | protein phosphatase 2A catalytic subunit      |
| TB927.3.5580   | tryptophanyl-tRNA synthetase         | TB927.6.1950   | hypothetical protein              | TB11.01.0450   | serine/threonine protein phosphatase          |
| TB927.5.3830   | dihydroorotate dehydrogenase         | TB927.7.5920   | sulfurtransferase                 | TB10.70.5680   | elongation factor 1-alpha                     |
| TB11.01.7325   | hypothetical protein                 | TB927.4.2710   | ubiquitin-conjugating enzyme E2   | TB09.211.1350  | cyclophilin- 40                               |
| TB927.7.2710   | NADH-cytochrome b5 reductase         | TB11.01.2790   | hypothetical protein              | TB927.5.1000   | ubiquitin-conjugating enzyme E2               |
| TB11.02.4440   | aminopeptidase                       | TB927.8.2080   | hypothetical protein              | TB10.70.1770   | eukaryotic translation initiation factor 6    |
| TB927.6.2090   | hypothetical protein                 | TB10.26.0960   | hypothetical protein              | TB927.4.3320   | uracil phosphoribosyltransferase              |
| TB927.7.6890   | hypothetical protein                 | TB11.22.0005   | phenylalanyl-tRNA synthetase      | TB09.160.4310  | glutamate dehydrogenase                       |
| TB927.3.1120   | GTP-binding nuclear protein rtb2     | TB927.4.2110   | protein phosphatase 2C            | TB927.5.1280   | hypothetical protein                          |
| TB927.5.2640   | hypothetical protein                 | TB11.01.7535   | 60S ribosomal protein L27         | TB10.6K15.2520 | prolyl oligopeptidase                         |
| TB927.8.5630   | dihydroorotase                       | TB10.70.5200   | glucose-6-phos1-dehydrogenase     | TB09.211.4511  | kinetoplastid membrane protein KMP-11         |
| TB11.02.4830   | protein kinase                       | TB11.01.5780   | hypothetical protein              | TB09.211.0110  | 60S ribosomal protein L10                     |
| TB927.3.4680   | RAB GDP dissociation inhibitor alpha | TB927.2.2770   | hypothetical protein              | TB09.211.3330  | cystathione gamma lyase                       |

|                |                                            |                |                                     |                |                                           |
|----------------|--------------------------------------------|----------------|-------------------------------------|----------------|-------------------------------------------|
| TB10.70.2180   | hypothetical protein                       | TB11.01.4880   | hypothetical protein                | TB11.02.0490   | RNA editing complex protein MP46          |
| TB11.02.3595   | SUI1-like protein                          | TB11.02.4250   | hypothetical protein                | TB10.70.1730   | 40S ribosomal protein S18                 |
| TB11.02.0750   | t-complex protein 1 subunit zeta           | TB927.7.3160   | dynein heavy chain, cytosolic       | TB09.211.0560  | hypothetical protein                      |
| TB10.6K15.0970 | phosphoribosylpyrophosphate synthetase     | TB927.6.5120   | 60S acidic ribosomal protein P2     | TB09.160.0770  | nitrilase                                 |
| TB11.47.0036   | calpain                                    | TB11.01.6740   | hypothetical protein                | TB10.100.0120  | proteasome subunit alpha 5                |
| TB927.6.4990   | ATP synthase, epsilon chain                | TB10.389.0630  | prolyl-tRNA synthetase              | TB927.7.7420   | ATP synthase alpha chain                  |
| TB10.70.6660   | hypox-guanine phosphoribosyltransferase    | TB10.61.3130   | hypothetical protein                | TB927.3.2230   | succinyl-CoA synthetase alpha subunit     |
| TB09.211.1380  | glycine cleavage system H protein          | TB927.8.6200   | tubulin folding cofactor D          | TB927.7.6270   | peptidase T, putative                     |
| TB10.70.2490   | proteasome subunit beta 2                  | TB10.6K15.2020 | glucose transporter                 | TB10.61.1870   | aminopeptidase                            |
| TB10.70.4880   | eukaryotic translation initiation factor 5 | TB11.02.0070   | aminopeptidase                      | TB09.244.2730  | 60S ribosomal protein L5                  |
| TB927.4.2240   | hypothetical protein                       | TB927.5.3960   | arginine N-methyltransferase        | TB10.406.0520  | trypanothione reductase                   |
| TB927.3.1030   | hypothetical protein                       | TB927.8.6660   | hypothetical protein                | TB927.7.4970   | glutamine synthetase                      |
| TB11.02.4950   | hypothetical protein                       | TB11.01.5860   | t-complex protein 1 subunit epsilon | TB10.6K15.3850 | glyceraldehyde 3-phosphate dehydrogenase  |
| TB927.6.2420   | p22 protein precursor                      | TB927.6.3840   | reticulon domain protein            | TB927.4.360    | hypothetical protein                      |
| TB10.26.0680   | hypothetical protein                       | TB927.5.3030   | hypothetical protein                | TB11.01.4660   | elongation factor 1 gamma                 |
| TB11.55.0024   | hypothetical protein                       | TB927.8.2640   | ubiquitin-activating enzyme E1      | TB10.70.4930   | hypothetical protein                      |
| TB10.6K15.3600 | myo-inositol-1-phosphate synthase          | TB927.7.3550   | hypothetical protein                | TB11.01.1820   | biotin--acetyl-CoA-carboxylase ligase     |
| TB11.02.3130   | malic enzyme                               | TB09.160.4680  | geranylgeranyl transferase          | TB11.02.0815   | ubiquitin-conjugating enzyme              |
| TB10.70.7050   | t-complex protein 1 subunit delta          | TB11.01.5790   | ubiquitin-conjugating enzyme E2     | TB11.02.2040   | hypothetical protein                      |
| TB927.4.1220   | leucine-rich repeat protein (LRRP)         | TB11.57.0008   | calpain-like protein                | TB927.1.220    | retrotransposon hot spot protein          |
| TB10.70.1490   | hypothetical protein                       | TB09.244.2570  | calcium motive p-type ATPase        | TB927.3.4290   | 73 kDa paraflagellar rod protein          |
| TB927.8.2740   | mitochondrial RNA binding protein          | TB927.3.3000   | hypothetical protein                | TB927.3.3450   | ADP-ribosylation factor-like protein 3A   |
| TB11.01.4830   | translation initiation factor 2 gamma      | TB10.6K15.1220 | isoleucyl-tRNA synthetase           | TB927.6.2280   | hypothetical protein                      |
| TB11.01.6660   | iron superoxide dismutase                  | TB09.160.2780  | fatty acyl CoA synthetase 2         | TB10.6K15.2620 | phosphoglycerate mutase                   |
| TB11.01.2120   | hypothetical protein                       | TB11.02.1690   | hypothetical protein                | TB927.2.280    | retrotransposon hot spot protein          |
| TB11.02.3990   | S-phase kinase-associated protein          | TB927.5.1820   | 60S acidic ribosomal protein        | TB927.7.2100   | GMP synthase                              |
| TB09.160.5530  | hypothetical protein                       | TB927.8.3790   | hypothetical protein                | TB10.70.1370   | fructose-bisphosphate aldolase glycosomal |
| TB09.211.2330  | small GTPase                               | TB927.6.4770   | hypothetical protein                | TB10.70.3660   | proteasome activator protein PA26         |
| TB11.02.5770   | mitochondrial RNA-binding protein          | TB927.5.3800   | carbomoyl phosphate synthase        | TB11.01.5680   | hypothetical protein                      |
| TB927.7.2990   | hypothetical protein                       | TB11.01.4740   | hypothetical protein                | TB10.70.0370   | phosphomannomutase                        |
| TB10.70.5150   | adenylate kinase                           | TB927.5.1730   | ecotin                              | TB09.V1.0380   | spermidine synthase                       |
| TB11.03.0230   | isocitrate dehydrogenase                   | TB11.02.4200   | 6-phosphogluconolactonase           | TB10.389.1370  | hypothetical protein                      |
| TB927.5.4470   | hypothetical protein                       | TB927.8.7020   | peptidase                           | TB10.70.0830   | clathrin heavy chain                      |
| TB11.03.0620   | hypothetical protein                       | TB09.211.3140  | hypothetical protein                | TB927.8.4970   | 69 kDa paraflagellar rod protein          |
| TB10.70.7730   | ATP-dependent DEAD/H RNA helicase          | TB927.3.4940   | hypothetical protein                | TB927.6.4840   | S-adenosylmethionine synthetase           |



|               |                                                |               |                                     |                |                                                  |
|---------------|------------------------------------------------|---------------|-------------------------------------|----------------|--------------------------------------------------|
| TB927.2.1080  | retrotransposon hot spot (RHS) protein         | TB11.01.8590  | hypothetical protein                | TB09.211.0050  | ubiquitin-conjugating enzyme E2                  |
| TB11.01.5320  | small GTPase                                   | TB927.8.1170  | hypothetical protein                | TB927.4.380    | hypothetical protein                             |
| TB10.70.5800  | hexokinase                                     | TB927.7.4390  | threonine synthase                  | TB10.70.1100   | translation elongation factor 1-beta             |
| TB10.70.4130  | hypothetical protein                           | TB11.01.0870  | replication factor A 51kDa subunit  | TB11.01.3170   | guanine nucleotide-binding protein -like protein |
| TB09.160.2540 | alpha/beta-hydrolase-like protein              | TB11.02.0250  | heat shock protein                  | TB927.7.2440   | pyrroline-5-carboxylate reductase                |
| TB927.7.7500  | iron/ascorbate oxidoreductase                  | TB11.01.8030  | hypothetical protein                | TB11.02.1210   | leucyl-tRNA synthetase                           |
| TB927.5.3350  | iron superoxide dismutase                      | TB927.7.45000 | hypothetical protein                | TB11.02.0290   | 3-ketoacid-coenzyme A transferase                |
| TB11.02.2700  | fumarate hydratase class I                     | TB09.244.2630 | 40S ribosomal protein S6            | TB10.26.0560   | 60S ribosomal protein L6                         |
| TB927.8.3690  | isocitrate dehydrogenase                       | TB927.7.2820  | histone H2A                         | TB927.7.3620   | tyrosyl-tRNA synthetase                          |
| TB09.211.2850 | cyclophilin                                    | TB927.8.7100  | acetyl-CoA carboxylase              | TB10.70.0280   | chaperonin Hsp60                                 |
| TB11.02.5170  | proteasome subunit beta 3                      | TB11.01.0420  | protein transport protein Sec13     | TB09.160.3670  | ribosomal protein S6                             |
| TB09.211.1370 | glyceraldehyde-3-phosphate dehydrogenase       | TB927.8.5890  | hypothetical protein                | TB927.3.3760   | tryparedoxin                                     |
| TB927.8.7510  | p-nitrophenylphosphatase                       | TB11.01.5350  | profilin                            | TB927.8.6170   | transketolase, putative                          |
| TB10.05.0080  | glucosidase                                    | TB927.2.5660  | adenylate kinase                    | TB10.389.1810  | kynurenine aminotransferase                      |
| TB927.8.3380  | electron transfer protein                      | TB10.61.3210  | hypothetical protein                | TB11.02.5450   | glucose-regulated protein 78                     |
| TB927.6.3650  | ADP-ribosylation factor                        | TB927.1.1670  | hypothetical protein                | TB11.02.3210   | triosephosphate isomerase                        |
| TB927.5.2570  | translation initiation factor                  | TB927.7.2080  | methyltransferase                   | TB927.5.1360   | hypothetical protein                             |
| TB11.02.2670  | hypothetical protein                           | TB09.160.4090 | DNA topoisomerase II                | TB10.61.2880   | aconitase                                        |
| TB927.1.3390  | hypothetical protein                           | TB927.8.2050  | mannose-1-phosphoguanlyltransferase | TB11.V4.0004   | ribonucleoside-diphosphate reductase             |
| TB927.6.2700  | small nuclear ribonucleoprotein Sm-E           | TB927.7.1010  | hypothetical protein                | TB927.8.2540   | 3-ketoacyl-CoA thiolase                          |
| TB10.05.0110  | serine/threonine protein phosphatase type 5    |               |                                     | TB10.6K15.3970 | developmentally regulated GTP-binding protein    |
| TB11.02.0140  | hypothetical protein                           |               |                                     | TB11.02.4150   | pyruvate phosphate dikinase                      |
| TB927.6.1000  | cysteine peptidase precursor                   |               |                                     | TB927.7.4060   | calpain-like cysteine peptidase                  |
| TB927.8.5030  | trafficking protein particle complex subunit 3 |               |                                     | TB11.01.5570   | hypothetical protein                             |
| TB10.70.5820  | hexokinase                                     |               |                                     | TB10.61.0540   | hypothetical protein                             |
| TB927.8.4210  | hypothetical protein                           |               |                                     | TB10.406.0560  | microtubule-associated protein                   |
| TB927.8.1140  | hypothetical protein                           |               |                                     | TB09.160.4570  | arginine kinase                                  |
| TB09.211.3050 | hypothetical protein                           |               |                                     | TB927.6.4280   | glyceraldehyde 3-phosphate dehydrogenase         |
| TB09.211.1695 | small nuclear ribonucleoprotein Sm-F           |               |                                     | TB09.160.5100  | hypothetical protein                             |
| TB10.70.7950  | hypothetical protein                           |               |                                     | TB927.6.400    | peptidase M20/M25/M40                            |
| TB10.70.1320  | N-acetyltransferase subunit Nat1               |               |                                     | TB927.3.1010   | hypothetical protein                             |
| TB927.8.7410  | calreticulin                                   |               |                                     | TB11.01.1680   | polyubiquitin                                    |
| TB09.211.2400 | hypothetical protein                           |               |                                     | TB11.01.8470   | dihydrolipoyl dehydrogenase                      |
| TB927.7.7460  | hypothetical protein                           |               |                                     | TB927.3.4040   | hypothetical protein                             |
| TB927.8.2000  | cyclophilin                                    |               |                                     | TB927.3.2600   | ATP-dependent DEAD/H RNA helicase                |

|                |                                              |                |                                               |
|----------------|----------------------------------------------|----------------|-----------------------------------------------|
| TB11.02.0100   | carboxypeptidase                             | TB09.211.4460  | ADP-ribosylation factor                       |
| TB927.8.6060   | 2-amino-3-ketobutyrate coenzyme A ligase     | TB09.211.1250  | proteasome subunit alpha 1                    |
| TB10.100.0070  | ATP synthase F1 subunit gamma                | TB10.05.0220   | 60S ribosomal protein L10a                    |
| TB10.61.0180   | peptidylprolyl isomerase-like protein        | TB927.3.5180   | cofilin/actin depolymerizing factor           |
| TB927.4.3590   | translation elongation factor 1-beta         | TB927.7.1140   | peroxidase 3                                  |
| TB927.8.6110   | hypothetical protein                         | TB927.7.2400   | tyrosyl-tRNA synthetase                       |
| TB09.211.1510  | small nuclear RNA gene activation protein 50 | TB927.7.1780   | adenine phosphoribosyltransferase             |
| TB927.3.3410   | aspartyl aminopeptidase                      | TB11.02.2310   | prostaglandin f synthase                      |
| TB10.6K15.0510 | 60S ribosomal protein L22                    | TB927.1.2100   | calpain-like cysteine peptidase, family C2    |
| TB09.211.4630  | hypothetical protein                         | TB11.01.8610   | hypothetical protein                          |
| TB11.46.0003   | protein kinase                               | TB927.7.3440   | I/6 autoantigen                               |
| TB927.8.7350   | trans-sialidase                              | TB10.70.4740   | enolase                                       |
| TB10.61.3180   | calcium-dependent lipid binding protein      | TB11.02.1070   | aminopeptidase                                |
| TB927.5.4560   | guanine deaminase                            | TB11.02.4870   | proteasome subunit alpha 7                    |
| TB927.6.2170   | co-chaperone GrpE                            | TB927.3.4880   | hypothetical protein                          |
| TB927.7.1320   | 10 kDa heat shock protein                    | TB927.8.740    | nucleolar RNA-binding protein, truncated      |
| TB11.02.5020   | seryl-tRNA synthetase                        | TB10.389.0880  | heat shock protein                            |
| TB927.7.6770   | hypothetical protein                         | TB09.160.0465  | hypothetical protein                          |
| TB927.8.5880   | eukaryotic translation initiation factor 1A  | TB927.2.5850   | small nuclear ribonucleoprotein               |
| TB927.1.120    | retrotransposon hot spot (RHS) protein       | TB10.6K15.2330 | t-complex protein 1 subunit theta             |
| TB927.6.4000   | hypothetical protein                         | TB10.100.0170  | proteasome subunit alpha 2                    |
| TB927.4.2040   | hypothetical protein                         | TB11.01.4621   | calmodulin                                    |
| TB10.70.3710   | aspartate aminotransferase                   | TB927.7.4570   | nucleoside hydrolase                          |
| TB927.4.1380   | hypothetical protein                         | TB11.02.0870   | hypothetical protein                          |
| TB927.5.1880   | ecotin                                       | TB10.70.3290   | ATP-dependent DEAD-box RNA helicase           |
| TB927.7.2700   | NADH-cytochrome b5 reductase                 | TB11.01.3080   | heat shock protein 70                         |
| TB10.6K15.0480 | hypothetical protein                         | TB927.1.3830   | glucose-6-phosphate isomerase, glycosomal     |
| TB927.1.2260   | calpain-like protein fragment                | TB927.7.5160   | deoxyuridine triphosphatase                   |
| TB927.3.3330   | heat shock protein 20                        | TB10.70.5110   | mitochondrial malate dehydrogenase            |
| TB927.8.6760   | IgE-dependent histamine-releasing factor     | TB10.70.0800   | universal minicircle sequence binding protein |
| TB927.2.1560   | cyclophilin                                  | TB09.160.4200  | 60S acidic ribosomalprotein                   |
| TB10.70.3510   | 60S ribosomal protein L18a                   | TB11.01.3110   | heat shock protein 70                         |
| TB927.5.3400   | calcium-translocating P-type ATPase          | TB927.7.4480   | adenosine 5'-monophosphoramidase              |
| TB11.01.0290   | carbonic anhydrase-like protein              | TB927.8.4330   | small GTP-binding protein Rab11               |
| TB927.3.5050   | 60S ribosomal protein L4                     | TB927.4.3950   | cytoskeleton-associated protein CAP5.5        |

|               |                                               |               |                                             |
|---------------|-----------------------------------------------|---------------|---------------------------------------------|
| TB927.7.230   | 40S ribosomal protein S33                     | TB10.406.0330 | histone H2B                                 |
| TB10.70.0820  | universal minicircle sequence binding protein | TB09.160.3710 | proliferative cell nuclear antigen          |
| TB927.1.3950  | alanine aminotransferase                      | TB11.02.2740  | aspartate aminotransferase mitochondrial    |
| TB09.160.2550 | ribosomal protein S7                          | TB927.5.2160  | hypothetical protein                        |
| TB10.61.1920  | fibrillarlin                                  | TB11.50.0005  | 60S ribosomal protein L21E                  |
| TB927.8.1990  | tryparedoxin peroxidase                       | TB927.7.5790  | protein disulfide isomerase                 |
| TB927.8.2210  | pteridine reductase                           | TB10.70.0850  | proteasome subunit alpha 1                  |
|               |                                               | TB927.3.2960  | I-A-G-nucleoside hydrolase                  |
|               |                                               | TB10.70.3360  | 40S ribosomal protein S3a                   |
|               |                                               | TB927.7.2980  | hypothetical protein                        |
|               |                                               | TB10.61.1210  | methionine aminopeptidase                   |
|               |                                               | TB11.01.0700  | ribose 5-phosphate isomerase                |
|               |                                               | TB927.4.2070  | antigenic protein                           |
|               |                                               | TB10.26.1080  | heat shock protein 83                       |
|               |                                               | TB927.2.100   | retrotransposon hot spot protein            |
|               |                                               | TB927.7.1130  | peroxidase 2                                |
|               |                                               | TB927.6.1880  | aspartyl-tRNA synthetase                    |
|               |                                               | TB09.211.2150 | poly(A)-binding protein 1                   |
|               |                                               | TB927.5.1700  | replication Factor A 28 kDa subunit         |
|               |                                               | TB10.389.1170 | P-type H <sup>+</sup> -ATPase               |
|               |                                               | TB11.01.8770  | hypothetical protein                        |
|               |                                               | TB10.61.1960  | 40S ribosomal protein S2                    |
|               |                                               | TB927.6.1570  | 2-hydroxy-3-oxopropionate reductase         |
|               |                                               | TB11.46.0008  | arginyl-tRNA synthetase                     |
|               |                                               | TB927.8.5330  | tyrosyl/methionyl-tRNA synthetase           |
|               |                                               | TB11.02.0210  | hypothetical protein                        |
|               |                                               | TB927.4.1300  | hypothetical protein                        |
|               |                                               | TB927.5.1090  | threonyl-tRNA synthetase                    |
|               |                                               | TB11.02.4030  | eukaryotic release factor 3                 |
|               |                                               | TB927.3.1790  | pyruvate dehydrogenase E1 beta subunit      |
|               |                                               | TB11.01.7960  | 60S ribosomal protein L2                    |
|               |                                               | TB927.4.3550  | 60S ribosomal protein L13a                  |
|               |                                               | TB11.03.0410  | eukaryotic translation initiation factor 5a |
|               |                                               | TB927.1.710   | phosphoglycerate kinase                     |
|               |                                               | TB927.8.5440  | flagellar calcium-binding protein TB-24     |

|                |                                               |
|----------------|-----------------------------------------------|
| TB10.70.6540   | hypoxanthine-guanin phosphoribosyltransferase |
| TB11.01.1290   | hypothetical protein                          |
| TB927.7.4420   | proteasome alpha 3 subunit                    |
| TB927.4.2740   | hypothetical protein                          |
| TB11.02.2030   | hypothetical protein                          |
| TB927.2.4930   | esterase                                      |
| TB10.70.5050   | hypothetical protein                          |
| TB927.8.6750   | translationally controlled tumor protein      |
| TB927.2.4580   | hypothetical protein                          |
| TB927.8.1440   | maoC-like dehydratase                         |
| TB927.7.2590   | prefoldin                                     |
| TB927.3.5310   | hypothetical protein                          |
| TB10.70.5650   | elongation factor 1-alpha                     |
| TB09.160.3730  | glutaminyl-tRNA synthetase                    |
| TB927.2.450    | retrotransposon hot spot protein              |
| TB10.70.1190   | valosin-containing protein homolog            |
| TB10.6K15.3250 | succinyl-CoA ligase [GDP-forming] beta-chain  |
| TB09.211.3300  | hypothetical protein                          |
| TB09.211.1690  | hypothetical protein                          |
| TB927.3.4750   | aminopeptidase                                |
| TB927.5.3820   | aspartate carbamoyltransferase                |
| TB10.389.1480  | cytosolic nonspecific dipeptidase             |
| TB927.8.890    | small GTP-binding protein Rab1                |
| TB09.211.4850  | 60S ribosomal protein L26                     |
| TB11.02.3120   | malic enzyme                                  |
| TB927.2.4370   | trypanothione synthetase                      |
| TB927.2.240    | retrotransposon hot spot protein              |
| TB927.1.420    | retrotransposon hot spot protein              |
| TB927.7.4520   | hypothetical protein                          |
| TB927.1.2330   | beta tubulin                                  |
| TB09.211.1620  | hypothetical protein                          |
| TB927.2.4590   | branched-chain amino acid aminotransferase    |
| TB09.160.1200  | mitotubule-associated protein Gb4             |
| TB10.406.0650  | microtubule-associated protein                |
| TB11.01.1740   | 2-oxoglutarate dehydrogenase E1 component     |

|               |                                        |
|---------------|----------------------------------------|
| TB927.2.1170  | retrotransposon hot spot protein       |
| TB927.3.780   | proteasome alpha 7 subunit             |
| TB09.160.4450 | 40S ribosomal protein S3               |
| TB927.8.5600  | transaldolase                          |
| TB10.70.6470  | methionyl-tRNA synthetase              |
| TB927.5.930   | NADH-dependent fumarate reductase      |
| TB927.6.1260  | proteasome beta-1 subunit              |
| TB11.03.0250  | cyclophilin A                          |
| TB927.4.2310  | asparaginyl-tRNA synthetase            |
| TB927.8.550   | peptide methionine sulfoxide reductase |
| TB10.70.5360  | La protein                             |
